# Supplementary material
Source: ML conference proceedings conference paper supplement (https://openreview.net/forum?id=SAlemvIoql9)
Supplement: supplementary_material [file attachment]

# Differentially Private Multi-Party Data Release for Linear Regression (Supplementary Material)

Ruihan Wu<sup>\*1</sup>   Xin Yang<sup>2</sup>   Yuanshun Yao<sup>2</sup>   Jiankai Sun<sup>2</sup>   Tianyi Liu<sup>2</sup>   Kilian Q. Weinberger<sup>1</sup>   Chong Wang<sup>2</sup>

<sup>1</sup>Cornell University, USA

<sup>2</sup>ByteDance Inc., USA

\*Work done as an intern at ByteDance Inc.

## A PROOFS OF USEFUL LEMMAS

**Lemma 1** (Gaussian mechanism). *For any deterministic real-valued function  $f : \mathcal{D} \rightarrow \mathbb{R}^m$  with sensitivity  $S_f$ , we can define a randomized function by adding Gaussian noise to  $f$ :*

$$f^{dp}(D) := f(D) + \mathcal{N}(\mathbf{0}, S_f^2 \sigma^2 \cdot I),$$

where  $\mathcal{N}(\mathbf{0}, S_f^2 \sigma^2 \cdot I)$  is a multivariate normal distribution with mean  $\mathbf{0}$  and co-variance matrix  $S_f^2 \sigma^2$  multiplying a  $m \times m$  identity matrix  $I$ . When  $\sigma \geq \frac{\sqrt{2 \log(1/(1.25\delta))}}{\epsilon}$ ,  $f^{dp}$  is  $(\epsilon, \delta)$ -differentially private.

**Lemma 2** (JL Lemma for inner-product preserving (Bernoulli)). *Suppose  $S$  be an arbitrary set of  $l$  points in  $\mathbb{R}^d$  and suppose  $s$  is an upper bound for the maximum L2-norm for vectors in  $S$ . Let  $B$  be a  $k \times d$  random matrix, where  $B_{ij}$  are independent random variables, which take value 1 and value  $-1$  with probability  $1/2$ . With the probability at least  $1 - (l + 1)^2 \exp\left(-k\left(\frac{\beta^2}{4} - \frac{\beta^3}{6}\right)\right)$ ,*

$$\frac{\mathbf{u}^\top \mathbf{v}}{s^2} - 4\beta \leq \frac{(B\mathbf{u}/\sqrt{k})^\top (B\mathbf{v}/\sqrt{k})}{s^2} \leq \frac{\mathbf{u}^\top \mathbf{v}}{s^2} + 4\beta.$$

**Lemma 3.** 1.  $\forall x \in [0, 1], -\log(1-x) - x \geq \frac{x^2}{2}$ .

2.  $\forall x \in [0, 1], x - \log(1+x) \geq \frac{x^2}{4}$ .

3.  $\forall x > 1, x - \log(1+x) \geq \frac{x}{2}$ .

*Proof.* Define  $f_1(x) := -\log(1-x) - x - \frac{x^2}{2}$ .  $f_1'(x) = \frac{x^2}{1-x} \geq 0$ . Thus  $f_1(x)$  increases on  $[0, 1]$  and  $f_1(x) \geq f_1(0) = 0$ .

Define  $f_2(x) := x - \log(1+x) - \frac{x^2}{4}$ .  $f_2'(x) = \frac{x(1-x)}{2(1+x)}$ .  $f_2(x)$  increases on  $[0, 1]$  and  $f_2(x) \geq f_2(0) = 0$ .

Define  $f_3(x) := x - \log(1+x) - \frac{x}{4}$ .  $f_3'(x) = \frac{3x-1}{4(1+x)} > 0$ .  $f_3(x)$  increases on  $[0, 1]$  and  $f_3(x) \geq f_3(1) > 0$ . □

**Lemma 4.** *Denote  $\hat{H}_n = \frac{1}{n} X^\top X$ ,  $\hat{C}_n = \frac{1}{n} X^\top Y$ ,  $H = \mathbb{E}_{(\mathbf{x}, y) \sim \mathcal{P}} [\mathbf{x}\mathbf{x}^\top]$  and  $C = \mathbb{E}_{(\mathbf{x}, y) \sim \mathcal{P}} [\mathbf{x} \cdot y]$ . Assume  $\|\hat{H}_n^{\text{pub}} - \hat{H}_n\| \leq \beta$ ,  $\|\hat{C}_n^{\text{pub}} - \hat{C}_n\| \leq \beta$  with prob  $1 - f(\beta)$ . We have that when  $\beta \leq \frac{2\|C\|\|H^{-1}\|+5}{8}$ ,*

$$\mathbb{P}_{X, \mathbf{y} \sim \mathcal{D}, R_1, R_2} [\|\hat{\mathbf{w}}_n^{\text{pub}} - \mathbf{w}^*\| \leq \beta] \geq 1 - h(\beta),$$

where  $\hat{\mathbf{w}}_n^{\text{pub}} = \left(\hat{H}_n^{\text{pub}}\right)^{-1} \hat{C}_n^{\text{pub}}$ ,  $c := \|C\|\|H^{-1}\|^2 + 2\|H^{-1}\|$  and  $h(\beta) = f(\beta/2c) + d^2 \exp\left(-\frac{n\beta^2}{8c^2d^2}\right) + d \exp\left(-\frac{n\beta^2}{8c^2d}\right)$ .

*Proof.* Hoeffding inequality and union bound together imply that with prob.  $1 - d^2 \exp\left(-\frac{n\beta^2}{2d^2}\right) - d \exp\left(-\frac{n\beta^2}{2d}\right)$ ,

$$\|\hat{H}_n - H\| \leq \beta, \|\hat{C}_n - C\| \leq \beta.$$

Thus with prob  $1 - g(\delta)$ ,  $\|\hat{H}_n^{\text{pub}} - H\| \leq \beta$ ,  $\|\hat{C}_n^{\text{pub}} - C\| \leq \beta$ , where  $g(\beta) = f(\beta/2) + d^2 \exp\left(-\frac{n\beta^2}{8d^2}\right) + d \exp\left(-\frac{n\beta^2}{8d}\right)$

We further have

- $\|\hat{C}_n^{\text{pub}}\| \leq \|C - \hat{C}_n\| + \|C\| \leq \|C\| + \beta$
- $\|(\hat{H}_n^{\text{pub}})^{-1} - H^{-1}\| \leq \|(\hat{H}_n^{\text{pub}})^{-1}\| \|H^{-1}\| \cdot \|\hat{H}_n^{\text{pub}} - H\| \leq \left(\|H^{-1}\| + \|(\hat{H}_n^{\text{pub}})^{-1} - H^{-1}\|\right) \cdot \|H^{-1}\| \cdot \beta$ , which implies that when  $\beta \leq \frac{1}{2\|H^{-1}\|}$ ,  $\|(\hat{H}_n^{\text{pub}})^{-1} - H^{-1}\| \leq \frac{\|H^{-1}\|^2 \cdot \beta}{1 - \|H^{-1}\| \cdot \beta} \leq \frac{\|H^{-1}\|^2 \cdot \beta}{2}$ .
- When  $\beta \leq \frac{1}{2\|H^{-1}\|}$ ,

$$\begin{aligned} \|(\hat{H}_n^{\text{pub}})^{-1} \hat{C}_n^{\text{pub}} - H^{-1}C\| &\leq \|\hat{C}_n^{\text{pub}}\| \cdot \|(\hat{H}_n^{\text{pub}})^{-1} - H^{-1}\| + \|H^{-1}\| \cdot \|\hat{C}_n^{\text{pub}} - C\| \\ &\leq (\|C\| + \beta) \cdot \frac{\|H^{-1}\|^2 \cdot \beta}{2} + \|H^{-1}\| \cdot \beta \\ &\leq \frac{(2\|C\| \|H^{-1}\|^2 + 5\|H^{-1}\|)}{4} \beta. \end{aligned}$$

Let  $b := \frac{(2\|C\| \|H^{-1}\|^2 + 5\|H^{-1}\|)}{4}$  and replace  $\beta$  by  $b^{-1}\beta$ , we have that when  $\beta \leq \frac{2\|C\| \|H^{-1}\| + 5}{8}$

$$\mathbb{P}_{X, Y \sim \mathcal{D}, R_1, R_2} [\|\hat{\mathbf{w}}_n - \mathbf{w}^*\| \leq \beta] \geq 1 - h(\beta),$$

where  $h(\beta) = g(\beta/b) = f(\beta/2b) + d^2 \exp\left(-\frac{n\beta^2}{8b^2d^2}\right) + d \exp\left(-\frac{n\beta^2}{8b^2d}\right)$ .  $\square$

**Lemma 5.** *If  $r$  is a random variable sampled from standard normal distribution, we have following concentration bound:*

$$\mathbb{P} [|r| < \beta] \geq 1 - \frac{2}{\sqrt{2\pi}\beta} \exp\left(-\frac{\beta^2}{2}\right)$$

*Proof.* It's shown in page 2 in Pollard [2015].  $\square$

**Lemma 6.** *If  $r_1, r_2$  are two independent random variables sampled from standard normal distribution,  $r_1 r_2$  can be written as  $\frac{c_1 - c_2}{2}$ , where  $c_1, c_2$  are independent two random variables sampled from chi-squared with degree 1. Moreover,  $\sum_{i=1}^n r_{1,n} r_{2,n}$  can be written as  $\frac{c_{1,1:n} - c_{2,1:n}}{2}$ , where  $c_{1,1:n}, c_{2,1:n}$  are independent two random variables sampled from chi-squared with degree  $n$ .*

*Proof.*  $r_1 r_2 = \frac{\left(\frac{r_1+r_2}{\sqrt{2}}\right)^2 - \left(\frac{r_1-r_2}{\sqrt{2}}\right)^2}{2}$ . Because  $r_1, r_2$  are two independent standard normal random variables,  $\frac{r_1+r_2}{\sqrt{2}}, \frac{r_1-r_2}{\sqrt{2}}$  are two independent standard normal random variables as well.  $c_1 := \frac{r_1+r_2}{\sqrt{2}}$  and  $c_2 := \frac{r_1-r_2}{\sqrt{2}}$  complete the proof for the first part.

$\sum_{i=1}^n r_{1,n} r_{2,n} = \frac{1}{2} \sum_{i=1}^n (c_{1,i} - c_{2,i}) = \frac{1}{2} (\sum_{i=1}^n c_{1,i} - \sum_{i=1}^n c_{2,i})$ .  $c_{1,1:n} := \sum_{i=1}^n c_{1,i}$  and  $c_{2,1:n} := \sum_{i=1}^n c_{2,i}$  finish the proof.  $\square$

## B PROOFS IN SECTION 4

We restate the assumptions and theorems for the completeness.

**Assumption 1.**  $D_i, i = 1, \dots, n$ , are i.i.d sampled from an underlying distribution  $\mathcal{P}$  over  $\mathbb{R}^{d+1}$ .

**Assumption 2.** The absolute values of all attributes are bounded by 1.

**Assumption 3.**  $\mathbb{E}_{(\mathbf{x}, y) \sim \mathcal{P}} [\mathbf{x}\mathbf{x}^\top]$  is positive definite.

**Theorem 1.** When  $\beta \leq c$  for some variable  $c$  that depends on  $\sigma_{\varepsilon, \delta}$ ,  $d$  and  $\mathcal{P}$ , but independent of  $n$ ,

$$\mathbb{P} [\|\hat{\mathbf{w}}_n^{\text{dgm}} - \mathbf{w}^*\| > \beta] < 1 - \exp \left( -O \left( \beta^2 \frac{n}{\sigma_{\varepsilon, \delta}^4 d^4} \right) + \tilde{O}(1) \right).$$

*Proof of Theorem 1.* Denote  $(\max_{j \in [m]} d_j)$  by  $d_{\max}$ . Denote  $R \in \mathbb{R}^{n \times d}$  is a random matrix s.t.  $R_{i,j} \sim \mathcal{N}(0, 4d_{\max} \sigma_{\varepsilon, \delta}^2)$ . We split  $R$  into  $R_X$  and  $R_Y$  representing the additive noise to  $X$  and  $Y$ .

$$\hat{\mathbf{w}}_n^{\text{dgm}} = \left( \frac{1}{n} (X + R_X)^\top (X + R_X) + (\lambda - 4d_{\max} \sigma_{\varepsilon, \delta}^2) I \right)^{-1} \frac{(X + R_X)^\top (Y + R_Y)}{n}.$$

1. For any  $i \in [d]$ ,  $\frac{1}{4d_{\max} \sigma_{\varepsilon, \delta}^2} [R_X^\top R_X]_{i,i}$  is sampled from chi-square distribution with degree  $n$ . From the cdf of chi-square distribution, we have following concentration:

$$\begin{aligned} \mathbb{P} \left[ \left| \left[ \frac{1}{n} R_X^\top R_X \right]_{i,i} - 4d_{\max} \sigma_{\varepsilon, \delta}^2 \right| < \beta \right] &\geq 1 - \exp \left( -n \cdot \left( \frac{\beta}{4d_{\max} \sigma_{\varepsilon, \delta}^2} - \log \left( 1 + \frac{\beta}{4d_{\max} \sigma_{\varepsilon, \delta}^2} \right) \right) \right) \\ &\quad - \exp \left( -n \cdot \left( -\log \left( 1 - \frac{\beta}{4d_{\max} \sigma_{\varepsilon, \delta}^2} \right) - \frac{\beta}{4d_{\max} \sigma_{\varepsilon, \delta}^2} \right) \right). \end{aligned}$$

Moreover, for  $i \neq j$ , Lemma 6 implies that  $\frac{1}{4d_{\max} \sigma_{\varepsilon, \delta}^2} [R_X^\top R_X]_{i,j}$  can be written as  $\frac{c_{1,1:n} - c_{2,1:n}}{2}$ , where  $c_{1,1:n}, c_{2,1:n}$  are independent two random variables sampled from chi-squared with degree  $n$ . Thus

$$\begin{aligned} \mathbb{P} \left[ \left| \left[ \frac{1}{n} R_X^\top R_X \right]_{i,j} \right| < \beta \right] &= \mathbb{P} \left[ \left| \frac{c_{1,1:n} - c_{2,1:n}}{2n} \right| < \frac{\beta}{4d_{\max} \sigma_{\varepsilon, \delta}^2} \right] \\ &\geq \mathbb{P} \left[ |c_{1,1:n} - n| < \frac{n\beta}{4d_{\max} \sigma_{\varepsilon, \delta}^2}, |c_{1,1:n} - n| < \frac{n\beta}{4d_{\max} \sigma_{\varepsilon, \delta}^2} \right] \\ &\geq 1 - 2\mathbb{P} \left[ |c_{1,1:n} - n| \geq \frac{n\beta}{4d_{\max} \sigma_{\varepsilon, \delta}^2} \right] \\ &\geq 1 - 2 \exp \left( -n \cdot \left( \frac{\beta}{4d_{\max} \sigma_{\varepsilon, \delta}^2} - \log \left( 1 + \frac{\beta}{4d_{\max} \sigma_{\varepsilon, \delta}^2} \right) \right) \right) \\ &\quad - 2 \exp \left( -n \cdot \left( -\log \left( 1 - \frac{\beta}{4d_{\max} \sigma_{\varepsilon, \delta}^2} \right) - \frac{\beta}{4d_{\max} \sigma_{\varepsilon, \delta}^2} \right) \right) \end{aligned}$$

Union bound implies that

$$\begin{aligned} \mathbb{P} \left[ \left\| \frac{1}{n} R_X^\top R_X - 4d_{\max} \sigma_{\varepsilon, \delta}^2 \cdot I \right\| \leq \beta_1 \right] &\geq 1 - d^2 \cdot \exp \left( -n \cdot \left( \frac{\beta_1}{4dd_{\max} \sigma_{\varepsilon, \delta}^2} - \log \left( 1 + \frac{\beta_1}{4dd_{\max} \sigma_{\varepsilon, \delta}^2} \right) \right) \right) \\ &\quad - d^2 \cdot \exp \left( -n \cdot \left( -\log \left( 1 - \frac{\beta_1}{4dd_{\max} \sigma_{\varepsilon, \delta}^2} \right) - \frac{\beta_1}{4dd_{\max} \sigma_{\varepsilon, \delta}^2} \right) \right) \end{aligned}$$

2.  $\mathbb{P} \left[ \left\| \frac{X^\top R_X}{n} \right\| \leq \beta_2 \right] \geq 1 - \frac{4\sigma_{\varepsilon, \delta} d^3 d_{\max}^{1/2}}{\sqrt{2\pi n} \beta_2} \exp \left( -\frac{n\beta_2^2}{8d^2 d_{\max} \sigma_{\varepsilon, \delta}^2} \right)$ , implied by Lemma 5.
3.  $\mathbb{P} \left[ \left\| \frac{X^\top R_Y}{n} \right\| \leq \beta_3 \right] \geq 1 - \frac{4\sigma_{\varepsilon, \delta} d^{3/2} d_{\max}^{1/2}}{\sqrt{2\pi n} \beta_3} \exp \left( -\frac{n\beta_3^2}{8dd_{\max} \sigma_{\varepsilon, \delta}^2} \right)$ , implied by Lemma 5.
4.  $\mathbb{P} \left[ \left\| \frac{R_X^\top Y}{n} \right\| \leq \beta_4 \right] \geq 1 - \frac{4\sigma_{\varepsilon, \delta} d^{3/2} d_{\max}^{1/2}}{\sqrt{2\pi n} \beta_4} \exp \left( -\frac{n\beta_4^2}{8dd_{\max} \sigma_{\varepsilon, \delta}^2} \right)$ , implied by Lemma 5.

5. Similar to 1,

$$\mathbb{P} \left[ \left\| \frac{R_X^\top R_Y}{n} \right\| \leq \beta_5 \right] \geq 1 - 2d \exp \left( -n \cdot \left( \frac{\beta_5}{4d^{1/2} d_{\max} \sigma_{\varepsilon, \delta}^2} - \log \left( 1 + \frac{\beta_5}{4d^{1/2} d_{\max} \sigma_{\varepsilon, \delta}^2} \right) \right) \right) \\ - 2d \exp \left( -n \cdot \left( -\log \left( 1 - \frac{\beta_5}{4d^{1/2} d_{\max} \sigma_{\varepsilon, \delta}^2} \right) - \frac{\beta_5}{4d^{1/2} d_{\max} \sigma_{\varepsilon, \delta}^2} \right) \right)$$

One can simplify  $-\log(1-x) - x$  and  $x - \log(1+x)$  by Lemma 3. Set  $\beta_1 = \frac{1}{2}\beta$ ,  $\beta_2 = \frac{1}{4}\beta$ ,  $\beta_3 = \beta_4 = \frac{1}{4}\beta$ ,  $\beta_5 = \frac{1}{2}\beta$ . The above concentrations together imply that when  $\beta < 8dd_{\max}\sigma_{\varepsilon, \delta}^2$ ,  $\|\hat{H}_n^{\text{pub}} - \hat{H}_n\| \leq \beta$ ,  $\|\hat{C}_n^{\text{pub}} - \hat{C}_n\| \leq \beta$  with prob at least  $1 - f(\beta)$ , where  $f(\beta) = \exp \left( -\min \left\{ O \left( n \cdot \frac{\beta^2}{d^2 d_{\max}^2 \sigma_{\varepsilon, \delta}^4} \right) + \tilde{O}(1) \right\} \right)$ .

With the application of Lemma 4: when  $\beta \leq \frac{2\|C\|\|H^{-1}\|+5}{8}$

$$\mathbb{P}_{X, Y \sim \mathcal{D}, R_1, R_2} [\|\hat{\mathbf{w}}_n - \mathbf{w}^*\| \leq \beta] \geq 1 - h(\beta),$$

where  $h(\beta)$  is:

1. when  $\beta < 16bdd_{\max}\sigma_{\varepsilon, \delta}^2$ ,  $h(\beta) = \exp \left( -O \left( n \cdot \frac{\beta^2}{d^2 d_{\max}^2 \sigma_{\varepsilon, \delta}^4} \right) + \tilde{O}(1) \right)$ ;
2. when  $\beta \geq 16bdd_{\max}\sigma_{\varepsilon, \delta}^2$ ,  $h(\beta) = \exp \left( -O \left( n \cdot \frac{\beta^2}{d^2 d_{\max}^2 \sigma_{\varepsilon, \delta}^4} \right) + \tilde{O}(1) \right)$ ;

where  $b = \frac{(2\|C\|\|H^{-1}\|^2+5\|H^{-1}\|)}{4}$  is a distribution dependent constant. In the other word, when  $\beta \leq \min \left\{ 16bdd_{\max}\sigma_{\varepsilon, \delta}^2, \frac{2\|C\|\|H^{-1}\|+5}{8} \right\}$ ,

$$\mathbb{P}_{X, Y \sim \mathcal{D}, R_1, R_2} [\|\hat{\mathbf{w}}_n - \mathbf{w}^*\| \leq \beta] \geq 1 - \exp \left( -O \left( n \cdot \frac{\beta^2}{d^2 d_{\max}^2 \sigma_{\varepsilon, \delta}^4} \right) + \tilde{O}(1) \right),$$

□

**Theorem 2.** When  $\beta \leq c$  for some variable  $c$  that depends on  $d$  and  $\mathcal{P}$ , but independent of  $n$  and  $\sigma_{\varepsilon, \delta}$ ,  $\mathbb{P} [\|\mathbf{w}_n^{\text{rmgm}} - \mathbf{w}^*\| > \beta] < \exp \left( -O \left( \min \left\{ \frac{k\beta^2}{d^2}, \frac{n\beta}{kd^2\sigma_{\varepsilon, \delta}^2}, \frac{n^{1/2}\beta}{d^{3/2}\sigma_{\varepsilon, \delta}} \right\} \right) + \tilde{O}(1) \right)$ . If we take  $k = O \left( \frac{(nd)^{1/2}}{d_{\max}\sigma_{\varepsilon, \delta}} \right)$ ,  $\mathbb{P} [\|\hat{\mathbf{w}}_n^{\text{rmgm}} - \mathbf{w}^*\| > \beta] < \exp \left( -\frac{n^{1/2}\beta}{d^{3/2}d_{\max}^{1/2}\sigma_{\varepsilon, \delta}} \cdot O(\min\{1, \beta\}) + \tilde{O}(1) \right)$ .

*Proof of Theorem 2.*

$$\hat{\mathbf{w}}_n^{\text{rmgm}} = \left( \frac{1}{n} \left( X^\top \frac{B^\top B}{k} X + X^\top \frac{B^\top}{\sqrt{k}} R_X + R_X^\top \frac{B}{\sqrt{k}} X + R_X^\top R_X \right) \right)^{-1} \left( \frac{1}{n} \left( X^\top \frac{B^\top B}{k} Y + R_X^\top \frac{B}{\sqrt{k}} Y + X^\top \frac{B^\top}{\sqrt{k}} R_Y + R_X^\top R_Y \right) \right)$$

Define  $M := \frac{1}{\sqrt{k}}B$ . Then we can make the analysis one by one.

1. JL-lemma applied by Bernoulli random variables implies that with probability  $1 - (d+2)^2 \exp \left( -k \left( \frac{\beta_1^2}{64d} - \frac{\beta_1^3}{96d\sqrt{d}} \right) \right)$ ,

$$\left\| \frac{1}{n} X^\top M^\top M Y - \frac{1}{n} X^\top Y \right\| \leq \beta_1.$$

*Proof.* Lemma 2 implies that with prob  $1 - (d+2)^2 \exp \left( k \left( \frac{\beta^2}{4} - \frac{\beta^3}{6} \right) \right)$ , for any  $u, v \in \{X_i^\top | i \in [d]\} \cup \{Y\}$ ,

$$\frac{(Mu)^\top Mv}{n} - 4\beta \leq \frac{u^\top v}{n} \leq \frac{(Mu)^\top Mv}{n} + 4\beta.$$

This further implies that

$$\left\| \frac{1}{n} X^\top M^\top M Y - \frac{1}{n} X^\top Y \right\| \leq 4\sqrt{d}\beta.$$

$\beta_1 = 4\sqrt{d}\beta$  helps finish the proof.  $\square$

2. JL-lemma applied by Bernoulli random variables implies that with probability  $1 - (d+2)^2 \exp\left(k\left(-\frac{\beta_2^2}{64d^2} - \frac{\beta_2^3}{96d^3}\right)\right)$ ,

$$\left\| \frac{1}{n} X^\top M^\top M X - \frac{1}{n} X^\top X \right\| \leq \beta_2.$$

3. With prob.  $1 - 2kd\sqrt{\frac{2kdd_{\max}\sigma_{\varepsilon,\delta}^2}{\pi n\beta_3}} \exp\left(-n\frac{\beta_3}{8kdd_{\max}\sigma_{\varepsilon,\delta}^2}\right)$ ,  $\left\| \frac{R_X^\top R_X}{n} \right\| \leq \beta_3$ .

*Proof.* To simplify the proof, let's assume  $R_X$  is a standard gaussian matrix. Because  $\mathbb{P}(|(R_X)_{ij}| \leq \beta) \geq 1 - \frac{2}{\sqrt{2\pi}\beta} \exp(-\beta^2/2)$  shown in Lemma 5,

$$\mathbb{P}(\|R_X^\top R_X\| \leq kd\beta) \geq \mathbb{P}(\|R_X\| \leq \sqrt{kd\beta}) \geq 1 - \frac{2kd}{\sqrt{2\pi}\beta} \exp(-\beta/2).$$

It's equivalent that

$$\mathbb{P}\left(\left\| \frac{R_X^\top R_X}{n} \right\|_2 \leq \beta_3\right) \geq 1 - 2kd\sqrt{\frac{kd}{2\pi n\beta_3}} \exp\left(-\frac{n}{2kd}\beta_3\right).$$

Plug-in the variance of  $R_X$  leads to the targeted inequality.  $\square$

4. With prob.  $1 - 2\left(\frac{1}{\sqrt{\pi\sigma_{\varepsilon,\delta}\beta_4\sqrt{nd_{\max}}}}d^{5/4} + 2kd\right) \cdot \exp\left(-\sqrt{n} \cdot \frac{\beta_4}{4\sigma_{\varepsilon,\delta}\sqrt{dd_{\max}}}\right)$

$$\left\| \frac{R_X^\top B Y}{n\sqrt{k}} \right\| \leq \beta_4, \left\| \frac{X^\top B^\top R_Y}{n\sqrt{k}} \right\| \leq \beta_4$$

*Proof.* Denote  $\mathbf{c} := \frac{R_X^\top B Y}{n\sqrt{k}}$  and further  $\mathbf{c}_i := \frac{((R_X)_i)^\top \mathbf{b}}{\sqrt{k}}$ , where  $(R_X)_i$  is the  $i$ th column for  $R_X$  and  $\mathbf{b} = \frac{B Y}{n}$ .

$$\begin{aligned} \mathbb{P}[|\mathbf{c}_i| \leq \beta] &= \int_{\mathbf{b}} \mathbb{P}[|\mathbf{c}_i| \leq \beta | \mathbf{b}] \mathbb{P}[\mathbf{b}] d\mathbf{b} \\ &\geq \max_{\alpha > 0} \int_{|\mathbf{b}| \leq \alpha \cdot \mathbf{1}} \mathbb{P}[|\mathbf{c}_i| \leq \beta | \mathbf{b}] \mathbb{P}[\mathbf{b}] d\mathbf{b} \\ &\geq \max_{\alpha > 0} \int_{|\mathbf{b}| \leq \alpha \cdot \mathbf{1}} \mathbb{P}[|\mathbf{c}_i| \leq \beta | |\mathbf{b}| = \alpha \cdot \mathbf{1}] \mathbb{P}[\mathbf{b}] d\mathbf{b} \\ &\geq \max_{\alpha > 0} \mathbb{P}[|\mathbf{c}_i| \leq \beta | |\mathbf{b}| = \alpha \cdot \mathbf{1}] \mathbb{P}[|\mathbf{b}| \leq \alpha \cdot \mathbf{1}] \\ &\geq \max_{\alpha > 0} \left( 1 - \frac{4\alpha\sigma_{\varepsilon,\delta}\sqrt{d_{\max}}}{\sqrt{2\pi}\beta} \exp\left(-\frac{\beta^2}{8\alpha^2\sigma_{\varepsilon,\delta}^2 d_{\max}}\right) - 2k \exp\left(-n \cdot \frac{4\alpha^2\sigma_{\varepsilon,\delta}^2 d_{\max}}{2}\right) \right) \\ &\geq 1 - \left( \frac{1}{\sqrt{\pi\sigma_{\varepsilon,\delta}\beta\sqrt{d_{\max}n}}} + 2k \right) \cdot \exp\left(-\sqrt{n} \cdot \frac{\beta}{4\sqrt{d_{\max}}\sigma_{\varepsilon,\delta}}\right) \quad // \alpha^2 = \frac{\beta}{2\sqrt{nd_{\max}}\sigma_{\varepsilon,\delta}}. \end{aligned}$$

Then

$$\mathbb{P}[\|\mathbf{c}\| \leq \beta] \geq 1 - \sum_{i=1}^d \mathbb{P}\left[\|\mathbf{c}_i\| > \frac{\beta}{\sqrt{d}}\right] \geq 1 - \left( \frac{1}{\sqrt{\pi\sigma_{\varepsilon,\delta}\beta\sqrt{d_{\max}n}}} d^{5/4} + 2kd \right) \cdot \exp\left(-\sqrt{n} \cdot \frac{\beta}{4\sigma_{\varepsilon,\delta}\sqrt{dd_{\max}}}\right).$$

Similarly,

$$\mathbb{P}\left[\left\| \frac{X^\top B^\top R_Y}{n\sqrt{k}} \right\| \leq \beta\right] \geq 1 - \left( \frac{1}{\sqrt{\pi\sigma_{\varepsilon,\delta}\beta\sqrt{nd_{\max}}}} d^{5/4} + 2kd \right) \cdot \exp\left(-\sqrt{n} \cdot \frac{\beta}{4\sigma_{\varepsilon,\delta}\sqrt{dd_{\max}}}\right).$$

$\square$

Union bound gives the conclusion.

$$5. \text{ With prob. } 1 - 2 \left( \frac{1}{\sqrt{\pi\sigma_{\varepsilon,\delta}\beta_5\sqrt{d_{\max}n}}} d^{5/2} + 2kd^2 \right) \cdot \exp \left( -\sqrt{n} \cdot \frac{\beta_5}{4\sigma_{\varepsilon,\delta}d_{\max}^{1/2}} \right)$$

$$\left\| \frac{R_X^\top BX}{n\sqrt{k}} \right\| \leq \beta_5,$$

which is implied similar to 4.

$$6. \text{ With prob. } 1 - 2k(d+1)\sqrt{\frac{2kd^{1/2}d_{\max}\sigma_{\varepsilon,\delta}^2}{\pi n\beta_6}} \exp \left( -n\frac{\beta_6}{8kd^{1/2}d_{\max}\sigma_{\varepsilon,\delta}^2} \right), \left\| \frac{R_X^\top R_Y}{n} \right\| \leq \beta_6.$$

*Proof.* To simplify the proof, let's assume  $R_X$  and  $R_Y$  is a standard gaussian matrix first. Because  $\mathbb{P}(|(R_X)_{ij}| \leq \beta) \geq 1 - \frac{2}{\sqrt{2\pi\beta}} \exp(-\beta^2/2)$  shown in Lemma 5,

$$\mathbb{P} \left( \|R_X^\top R_Y\| \leq k\sqrt{d}\beta \right) \geq \mathbb{P} \left( \|R_X\| \leq \sqrt{kd}\beta, \|R_Y\| \leq \sqrt{k}\beta \right) \geq 1 - \frac{2k(d+1)}{\sqrt{2\pi\beta}} \exp(-\beta/2).$$

It's equivalent that

$$\mathbb{P} \left( \left\| \frac{R_X^\top R_Y}{n} \right\| \leq \beta_6 \right) \geq 1 - 2k(d+1)\sqrt{\frac{k\sqrt{d}}{2\pi n\beta_6}} \exp \left( -\frac{n}{2k\sqrt{d}}\beta_6 \right).$$

Plug-in the variance of  $R_X$  and  $R_Y$  leads to the targeted inequality.  $\square$

$$\text{Define } \hat{H}_n^{\text{rmgm}} := \frac{1}{n} \left( X^\top \frac{A^\top A}{k} X + X^\top \frac{A^\top}{\sqrt{k}} R_X + R_X^\top \frac{A}{\sqrt{k}} X + \frac{1}{n} R_X^\top R_X \right), \hat{H}_n := \frac{X^\top X}{n}, \hat{C}_n^{\text{rmgm}} = \frac{1}{n} \left( X^\top \frac{A^\top A}{k} Y + R_X^\top \frac{A}{\sqrt{k}} Y + X \frac{A}{\sqrt{k}} R_Y + R_X^\top R_Y \right), \hat{C}_n = \frac{1}{n} X^\top Y.$$

The above analysis implies that, with prob.

$$1 - (d+2)^2 \exp \left( -k \left( \frac{\beta_1^2}{64d} - \frac{\beta_1^3}{96d\sqrt{d}} \right) \right) - (d+2)^2 \exp \left( -k \left( \frac{\beta_2^2}{64d^2} - \frac{\beta_2^3}{96d^3} \right) \right)$$

$$- 2kd\sqrt{\frac{2kdd_{\max}\sigma_{\varepsilon,\delta}^2}{\pi n\beta_3}} \exp \left( -n\frac{\beta_3}{8kdd_{\max}\sigma_{\varepsilon,\delta}^2} \right) - \left( \frac{1}{\sqrt{\pi\sigma_{\varepsilon,\delta}\beta_4\sqrt{nd_{\max}}}} d^{5/4} + 2kd \right) \cdot \exp \left( -\sqrt{n} \cdot \frac{\beta_4}{4\sigma_{\varepsilon,\delta}\sqrt{dd_{\max}}} \right)$$

$$- \left( \frac{1}{\sqrt{\pi\sigma_{\varepsilon,\delta}\beta_5\sqrt{nd_{\max}}}} d^{5/2} + 2kd^2 \right) \cdot \exp \left( -\sqrt{n} \cdot \frac{\beta_5}{4\sigma_{\varepsilon,\delta}d_{\max}^{1/2}} \right) - 2k(d+1)\sqrt{\frac{2kd^{1/2}d_{\max}\sigma_{\varepsilon,\delta}^2}{\pi n\beta_6}} \exp \left( -n\frac{\beta_6}{8kd^{1/2}d_{\max}\sigma_{\varepsilon,\delta}^2} \right)$$

we have

$$\|\hat{H}_n^{\text{rmgm}} - \hat{H}_n\| \leq \beta_2 + \beta_3 + 2\beta_5, \|\hat{B}_n^{\text{rmgm}} - \hat{B}_n\| \leq \beta_1 + 2\beta_4 + \beta_6.$$

Let  $\beta_2 = \frac{2\beta}{3}$ ,  $\beta_3 = \frac{\beta}{6}$ ,  $\beta_5 = \frac{\beta}{12}$  and  $\beta_1 = \beta_4 = \beta_6 = \frac{\beta}{4}$ . We will have  $\|\hat{H}_n^{\text{pub}} - \hat{H}_n\| \leq \beta$ ,  $\|\hat{C}_n^{\text{pub}} - \hat{C}_n\| \leq \beta$ , with prob.  $1 - f(\beta)$ ,  $\forall \beta \leq 4\sqrt{d}$  (implies  $\beta_1 \leq \sqrt{d}$  and  $\beta_2 \leq d$ ), where

$$f(\beta) = (d+2)^2 \exp \left( -\frac{k\beta^2}{768d} \right) + (d+2)^2 \exp \left( -\frac{k\beta^2}{432d^2} \right)$$

$$+ 2kd\sqrt{\frac{12kdd_{\max}\sigma_{\varepsilon,\delta}^2}{\pi n\beta}} \exp \left( -n\frac{\beta}{48kdd_{\max}\sigma_{\varepsilon,\delta}^2} \right) + \left( \frac{2}{\sqrt{\pi\sigma_{\varepsilon,\delta}\beta\sqrt{nd_{\max}}}} d^{5/4} + 2kd \right) \cdot \exp \left( -\sqrt{n} \cdot \frac{\beta}{16\sigma_{\varepsilon,\delta}\sqrt{dd_{\max}}} \right)$$

$$+ \left( \frac{2\sqrt{3}}{\sqrt{\pi\sigma_{\varepsilon,\delta}\beta\sqrt{nd_{\max}}}} d^{5/2} + 2kd^2 \right) \cdot \exp \left( -\sqrt{n} \cdot \frac{\beta}{48\sigma_{\varepsilon,\delta}d_{\max}^{1/2}} \right) + 2k(d+1)\sqrt{\frac{8kd^{1/2}d_{\max}\sigma_{\varepsilon,\delta}^2}{\pi n\beta}} \exp \left( -n\frac{\beta}{48kd^{1/2}d_{\max}\sigma_{\varepsilon,\delta}^2} \right)$$

Lemma 4 implies that for  $\beta \leq \min\{8b\sqrt{d}, \frac{2\|C\|\|H^{-1}\|+5}{8}\}$ , we have

$$\mathbb{P}[\|\hat{\mathbf{w}}_n - \mathbf{w}^*\| \leq \beta] \geq 1 - h(\beta),$$

where  $h(\beta)$  is:

$$h(\beta) = \exp\left(-\min\left\{O\left(\frac{k\beta^2}{d^2}\right), O\left(n\frac{\beta}{kdd_{\max}\sigma_{\varepsilon,\delta}^2}\right), O\left(n^{1/2}\frac{\beta}{dd_{\max}^{1/2}\sigma_{\varepsilon,\delta}}\right)\right\} + \tilde{O}(1)\right),$$

where  $\tilde{O}(1)$  includes  $\log$  terms of  $n, d, d_{\max}, k, \beta$ . If we take  $k = O\left(\frac{(nd)^{1/2}}{d_{\max}^{1/2}\sigma_{\varepsilon,\delta}}\right)$ ,

$$h(\beta) = \exp\left(-\frac{n^{1/2}\beta}{d^{3/2}d_{\max}^{1/2}\sigma_{\varepsilon,\delta}} \cdot O(\min\{1, \beta\}) + \tilde{O}(1)\right).$$

□

## REFERENCES

David Pollard. A few good inequalities, November 2015.
