# Supplementary material
Source: ML conference proceedings conference paper supplement (https://openreview.net/forum?id=SAlemvIoql9)

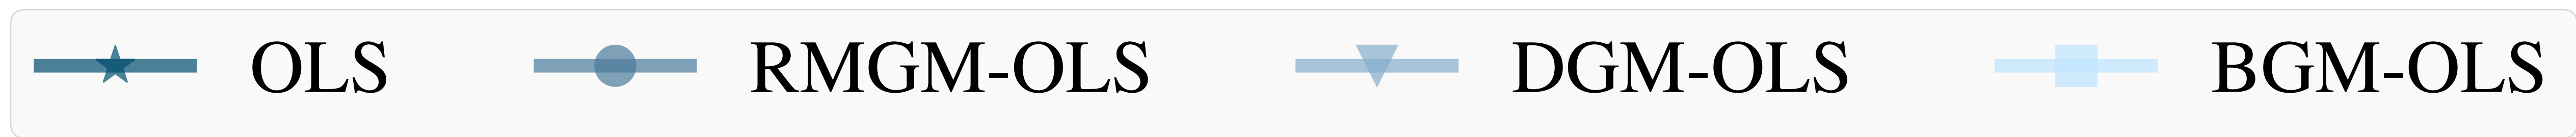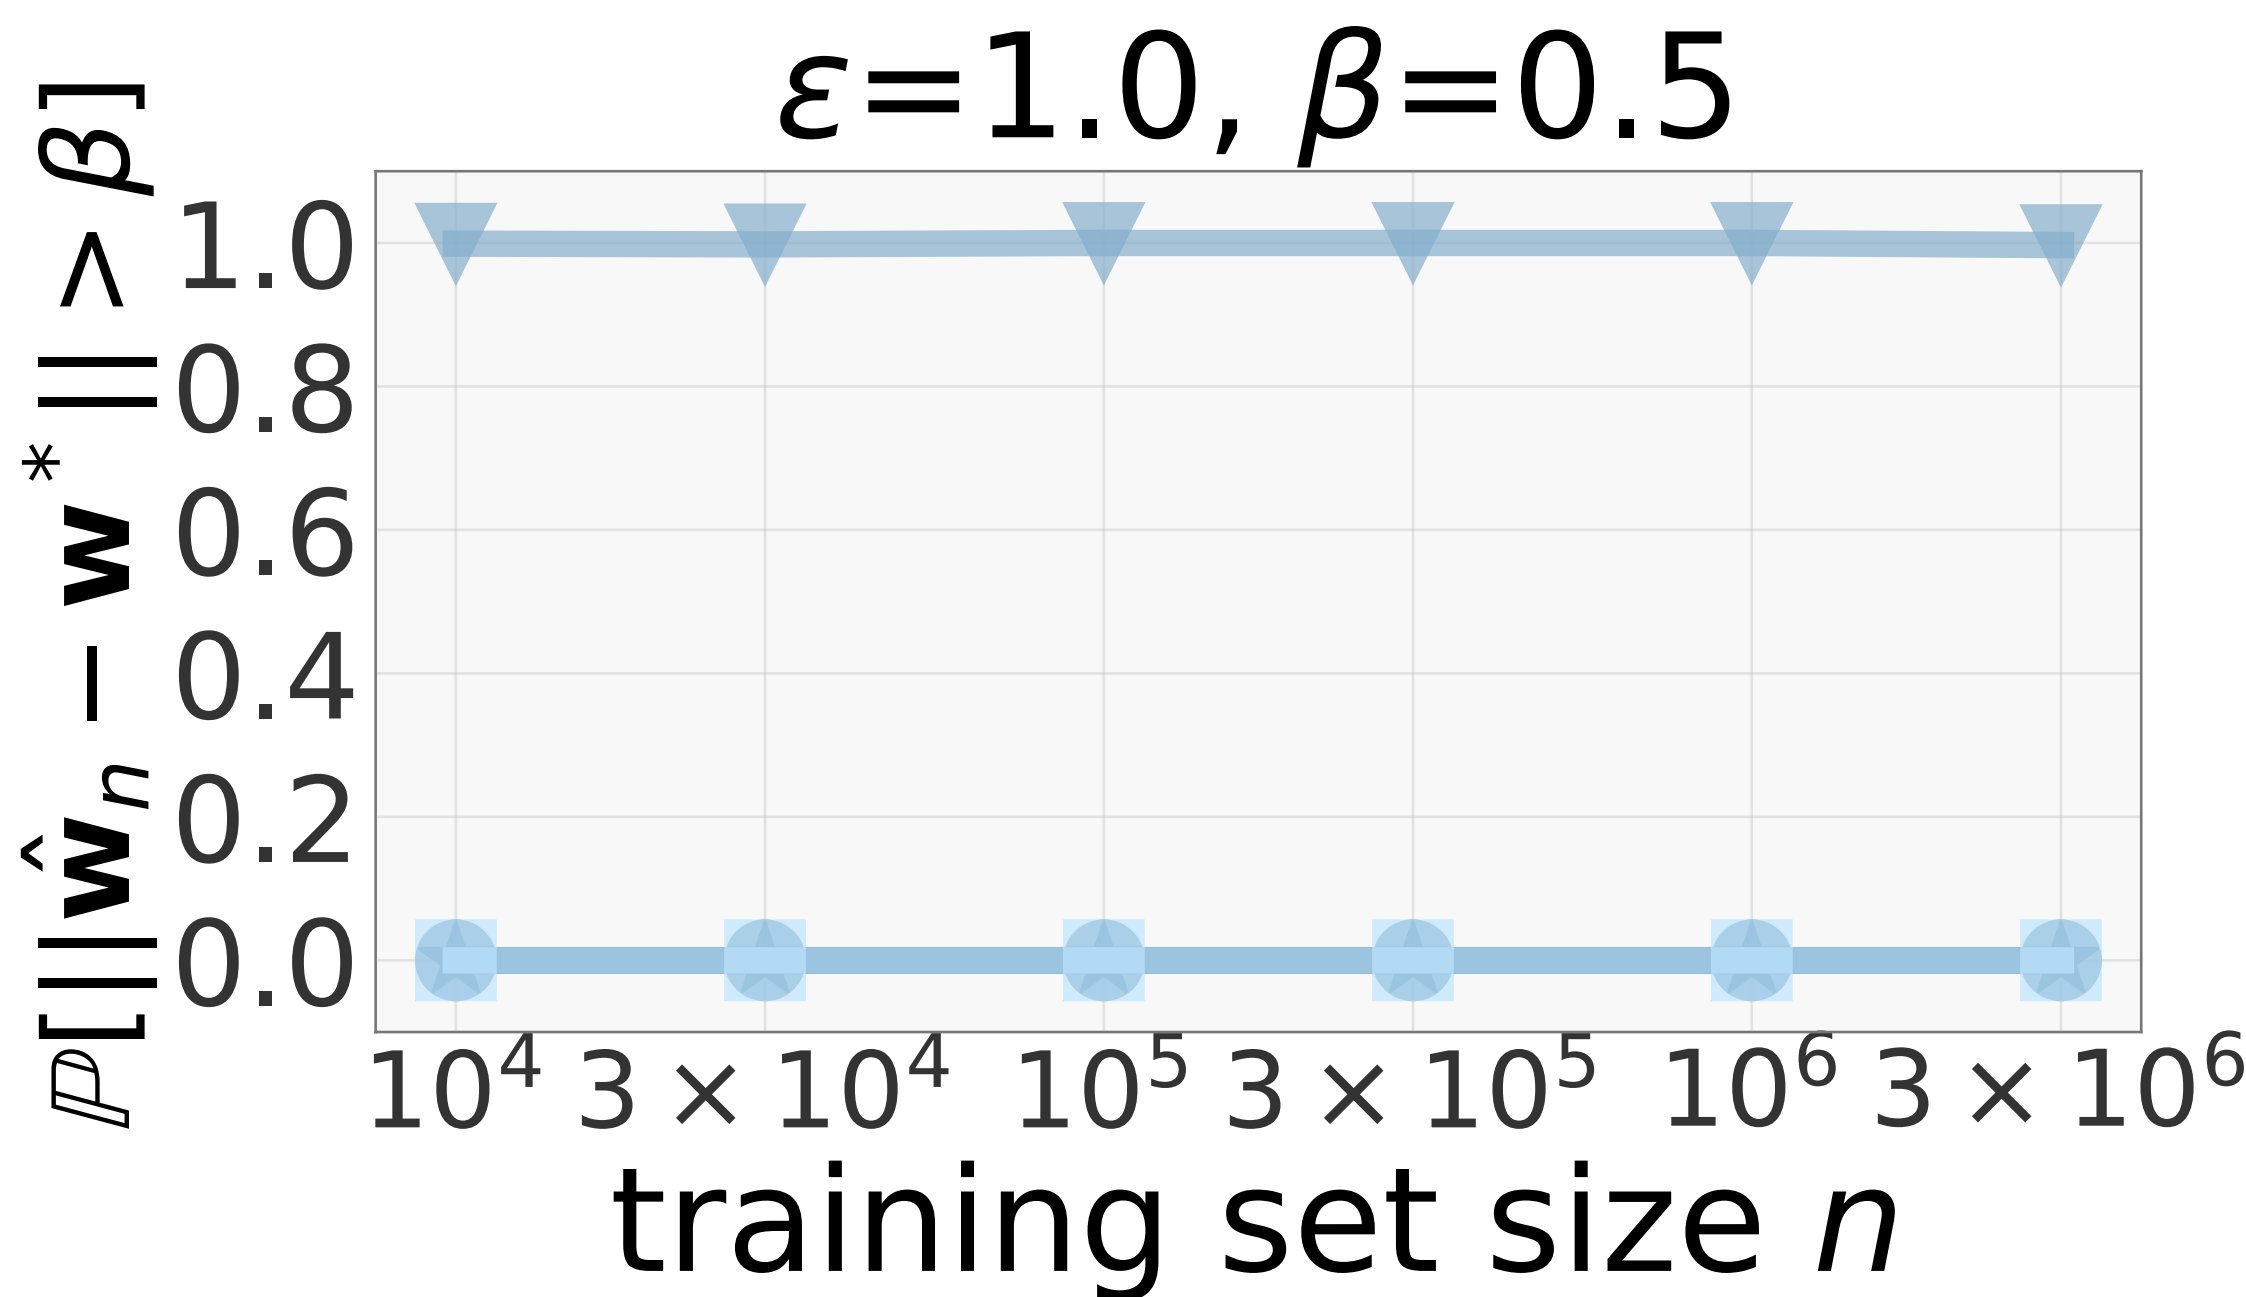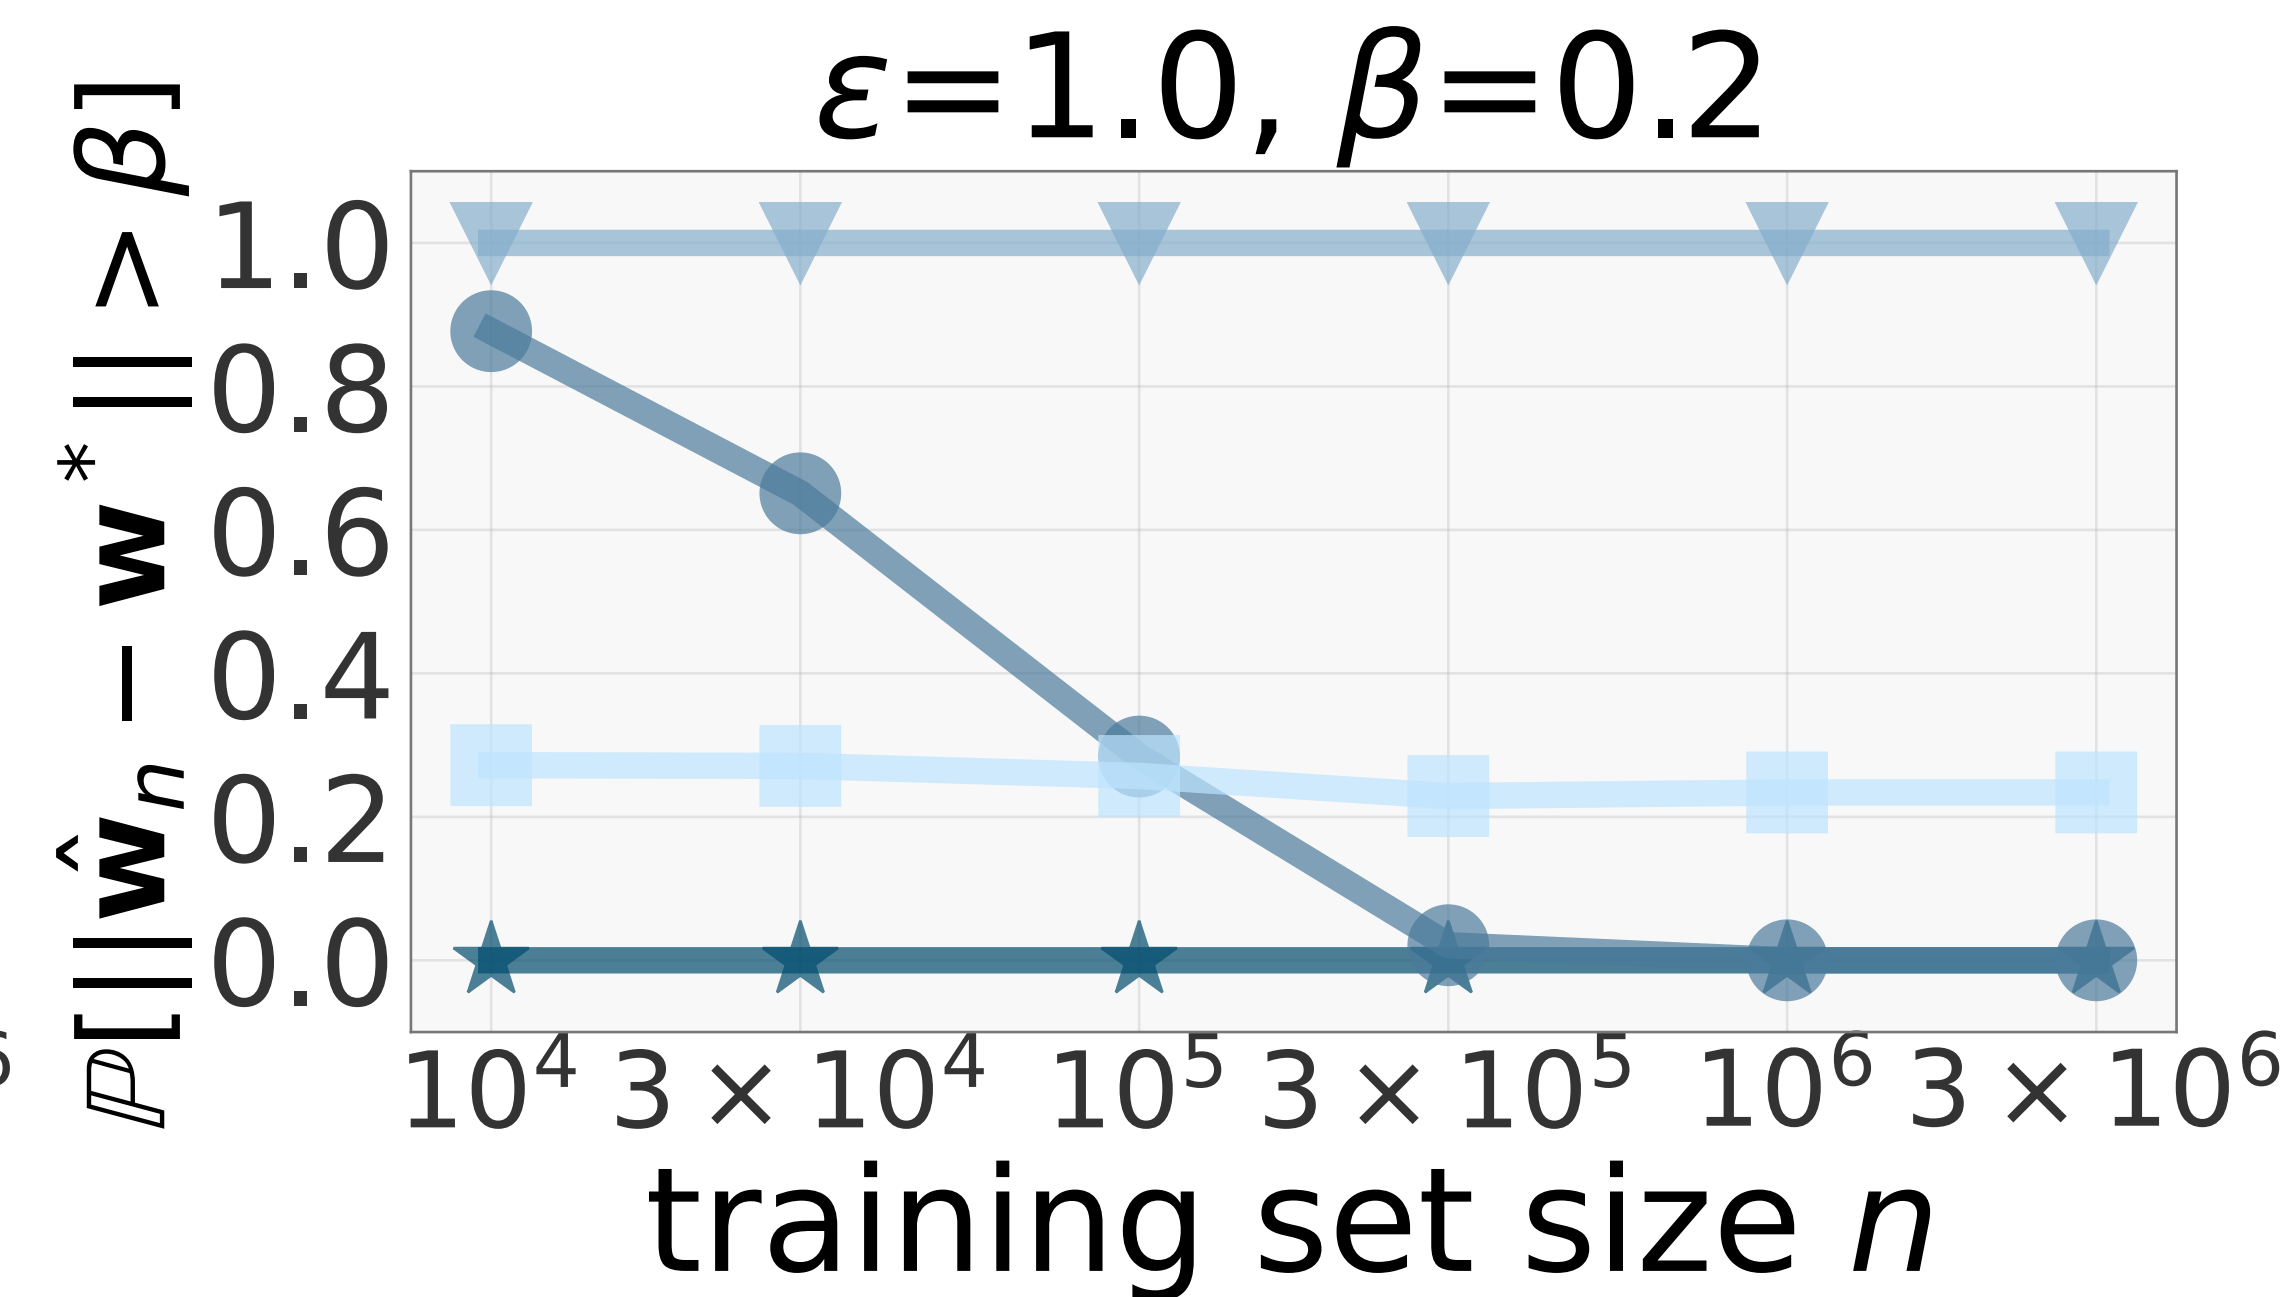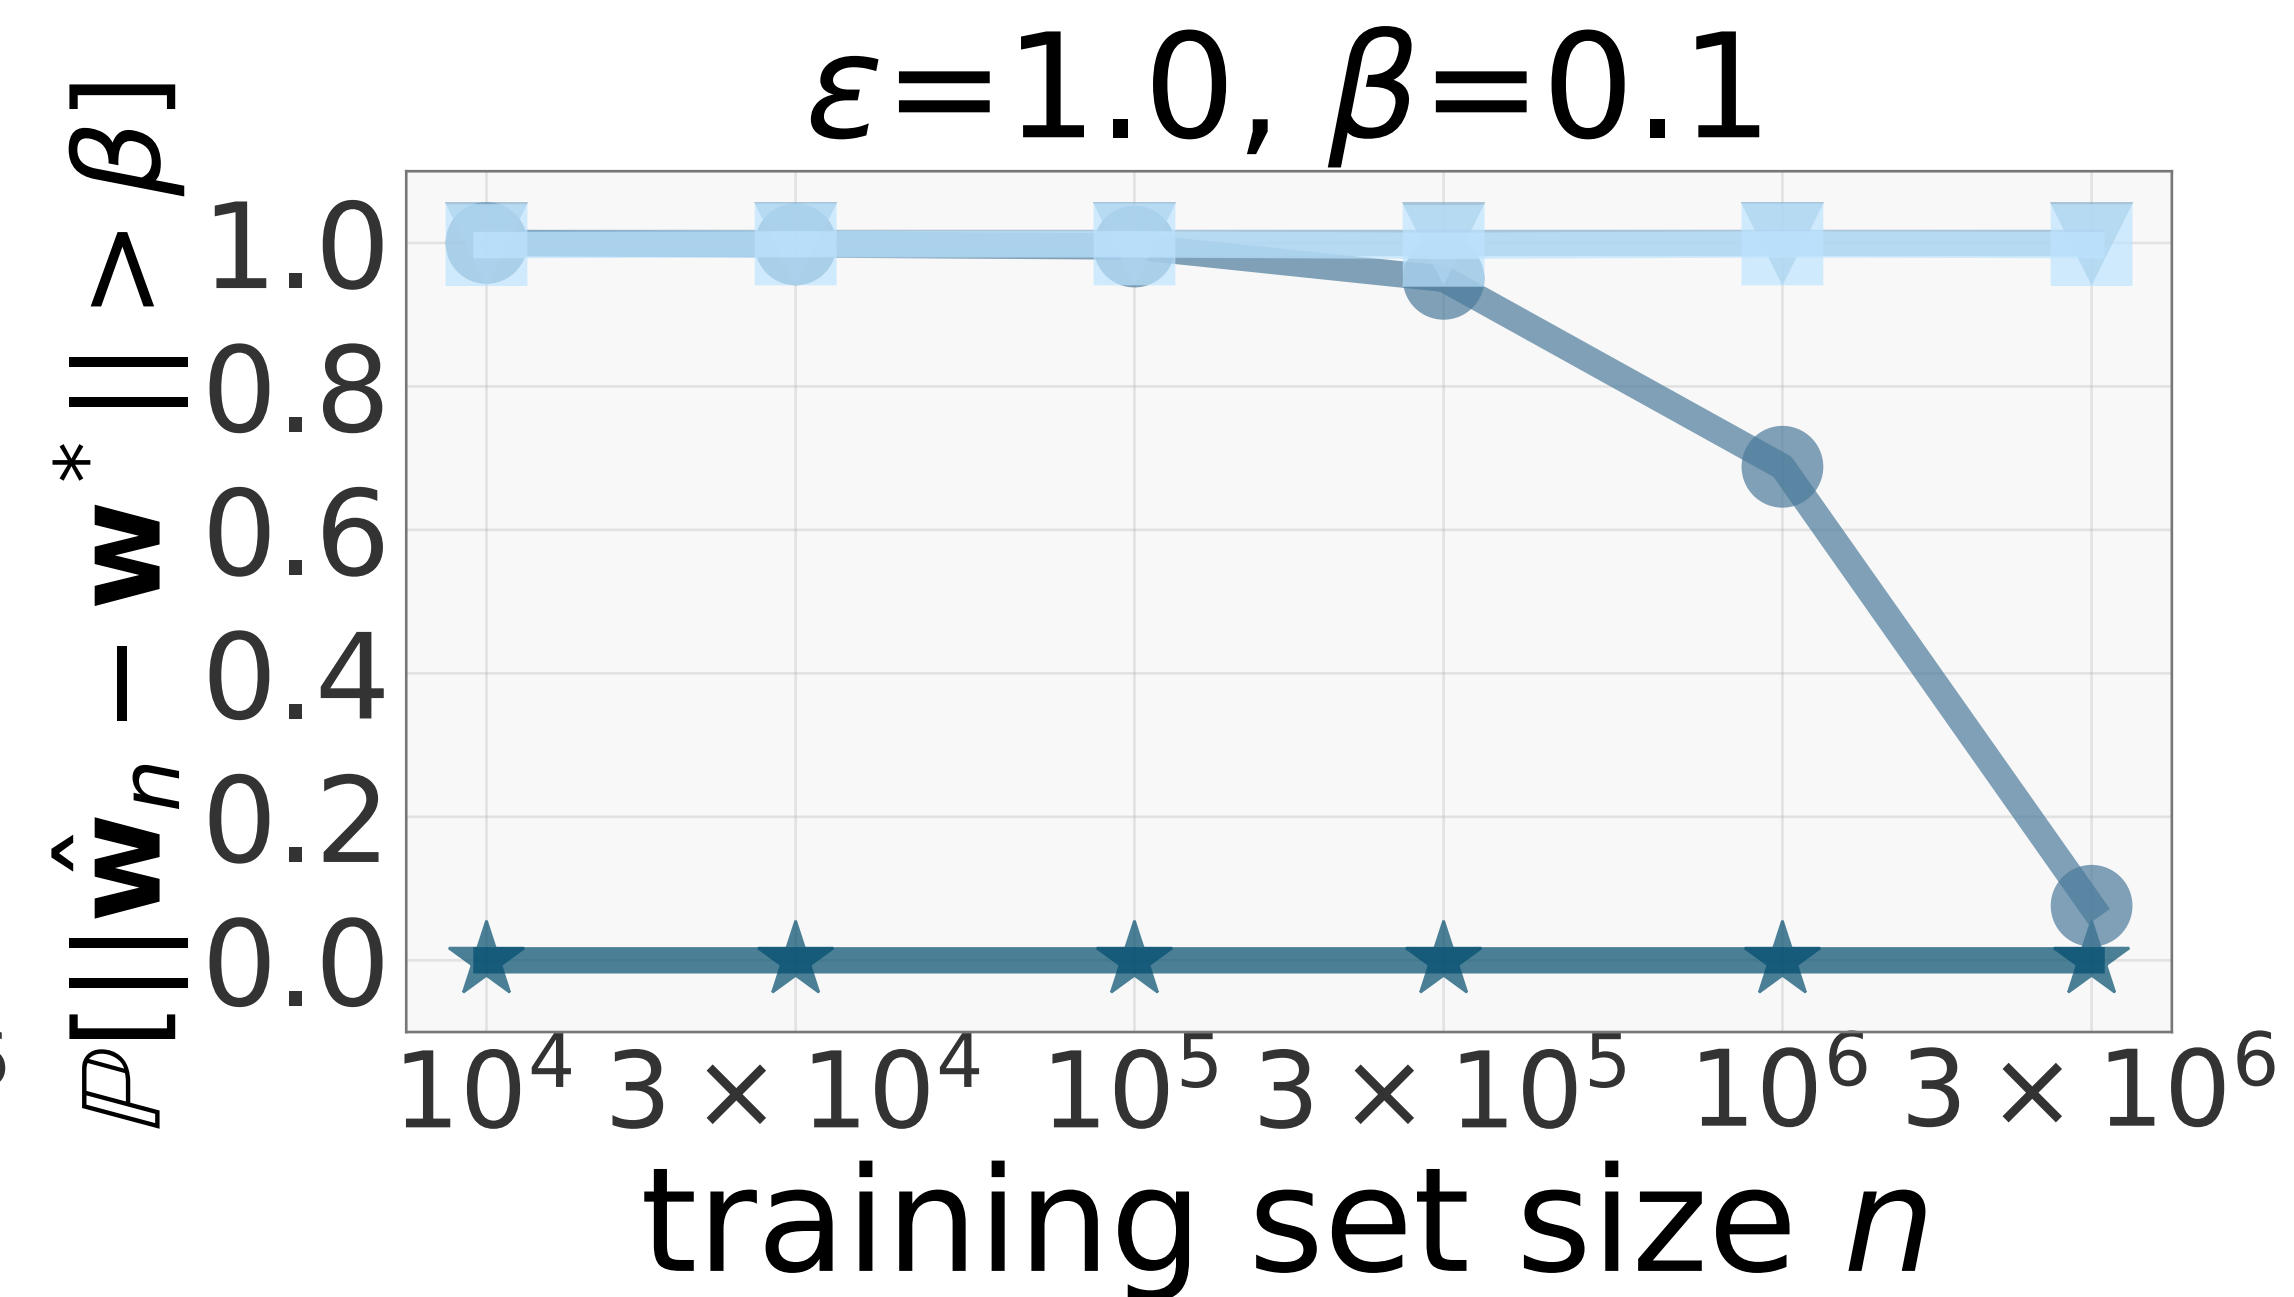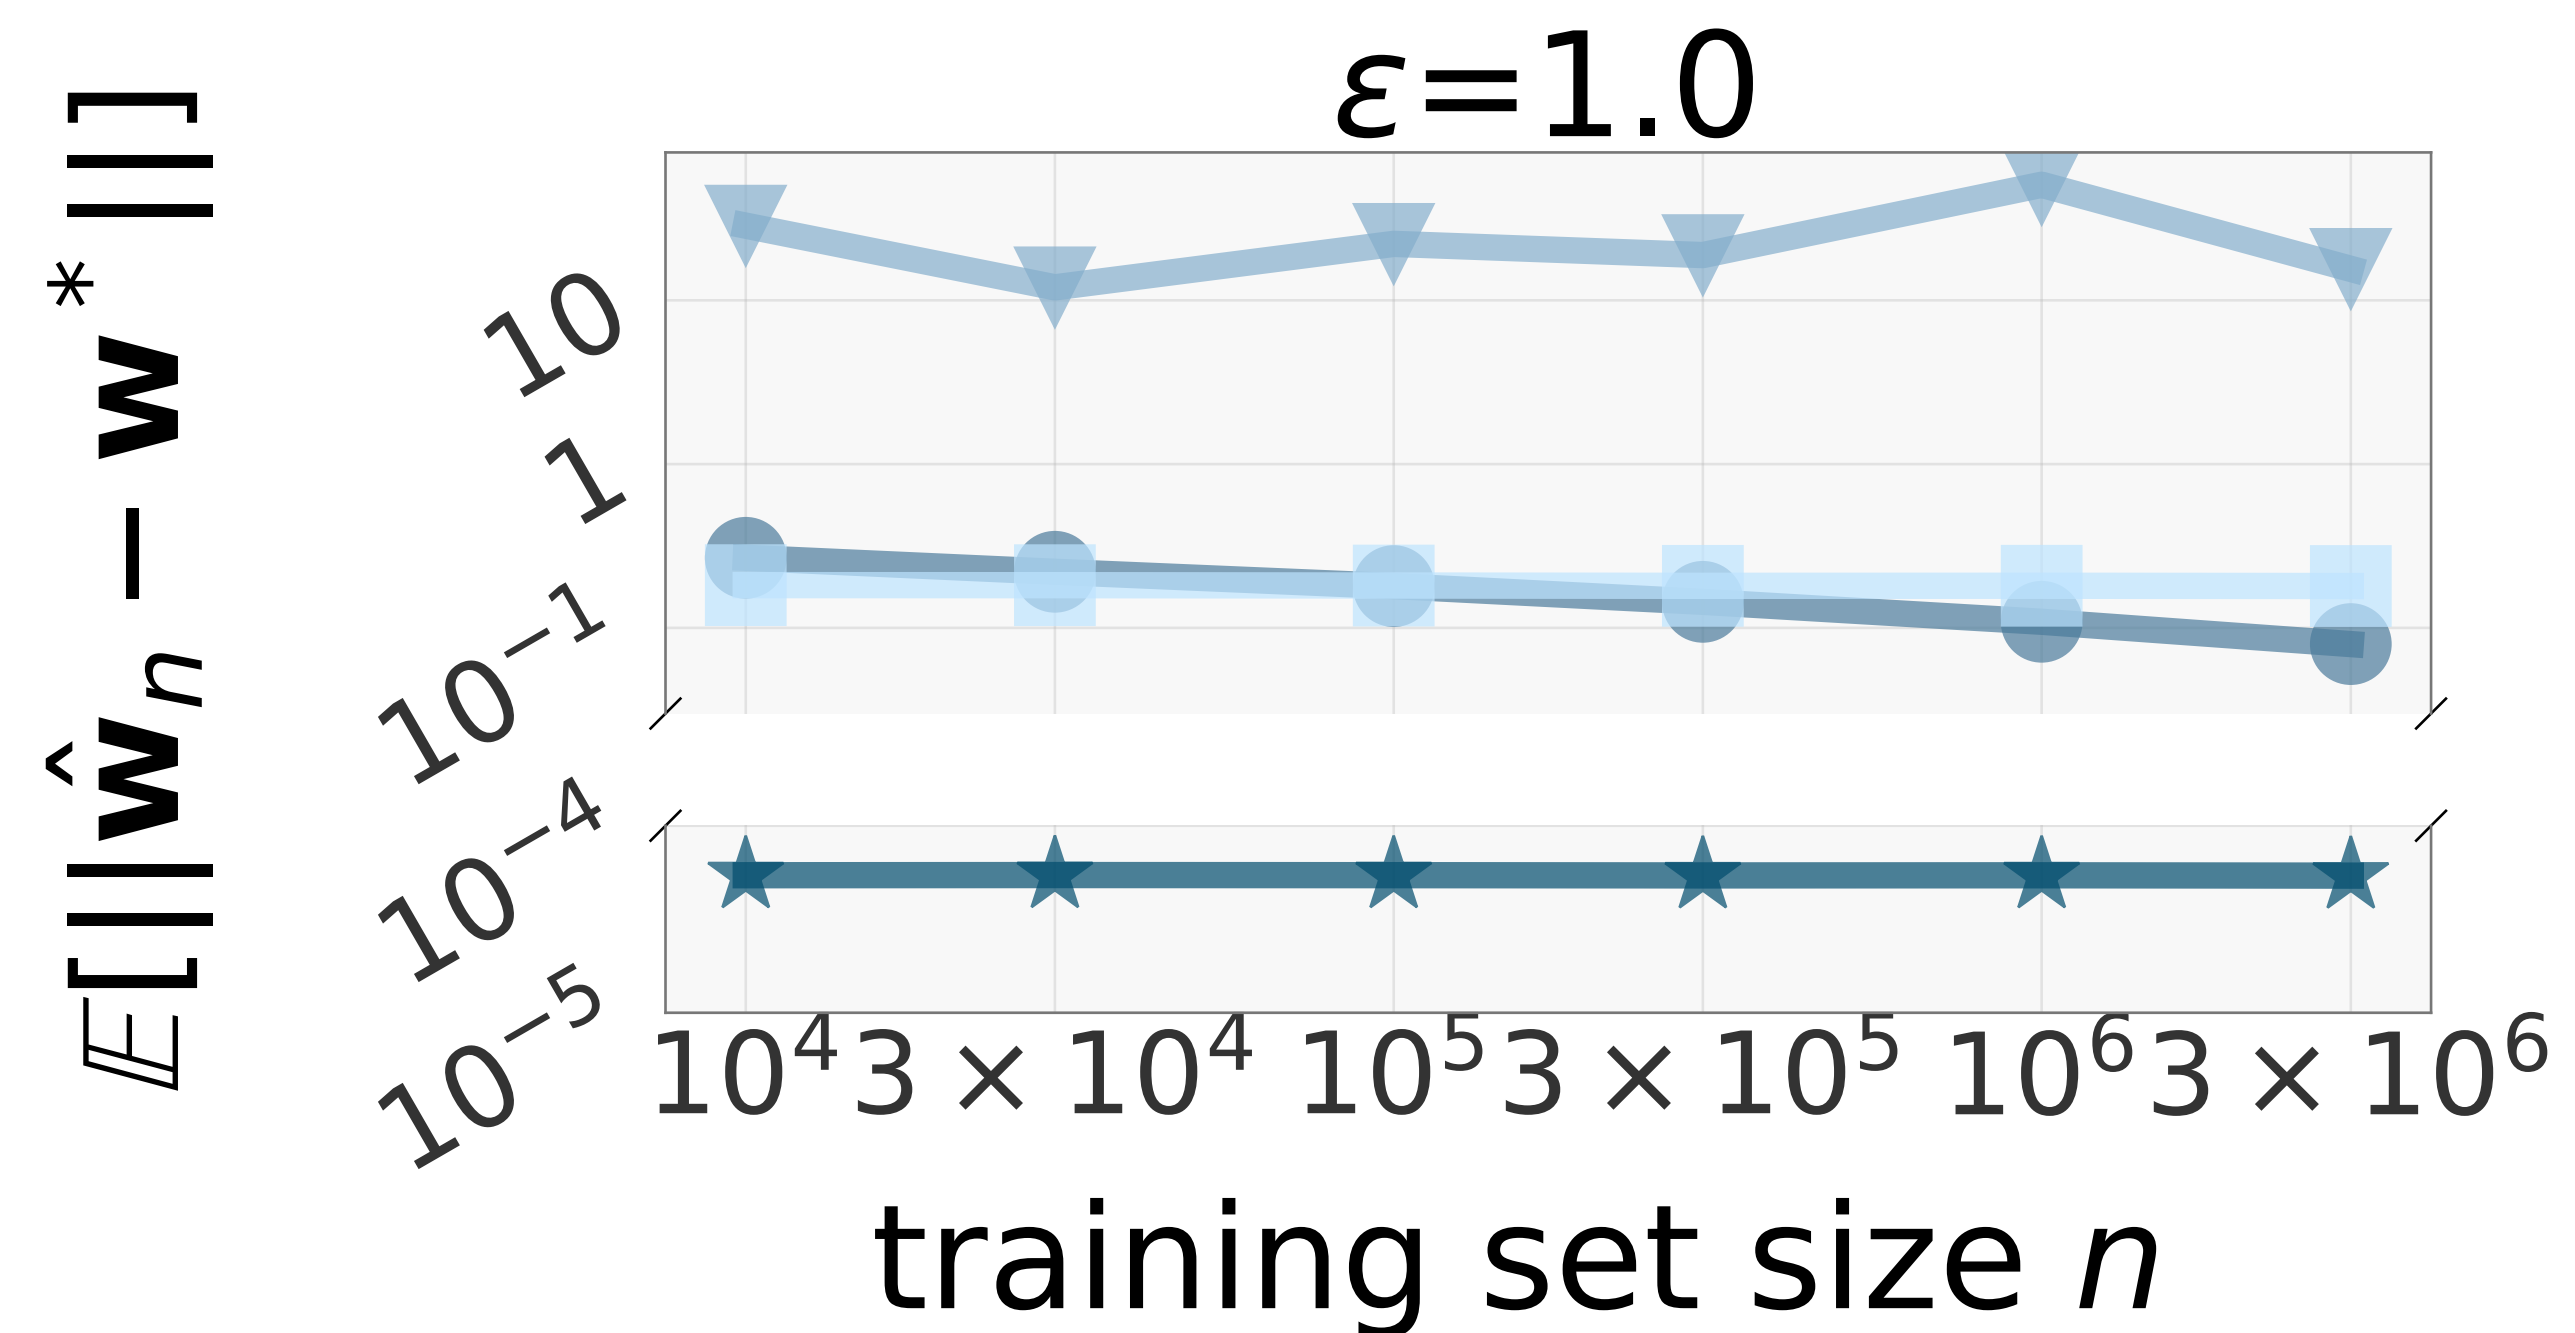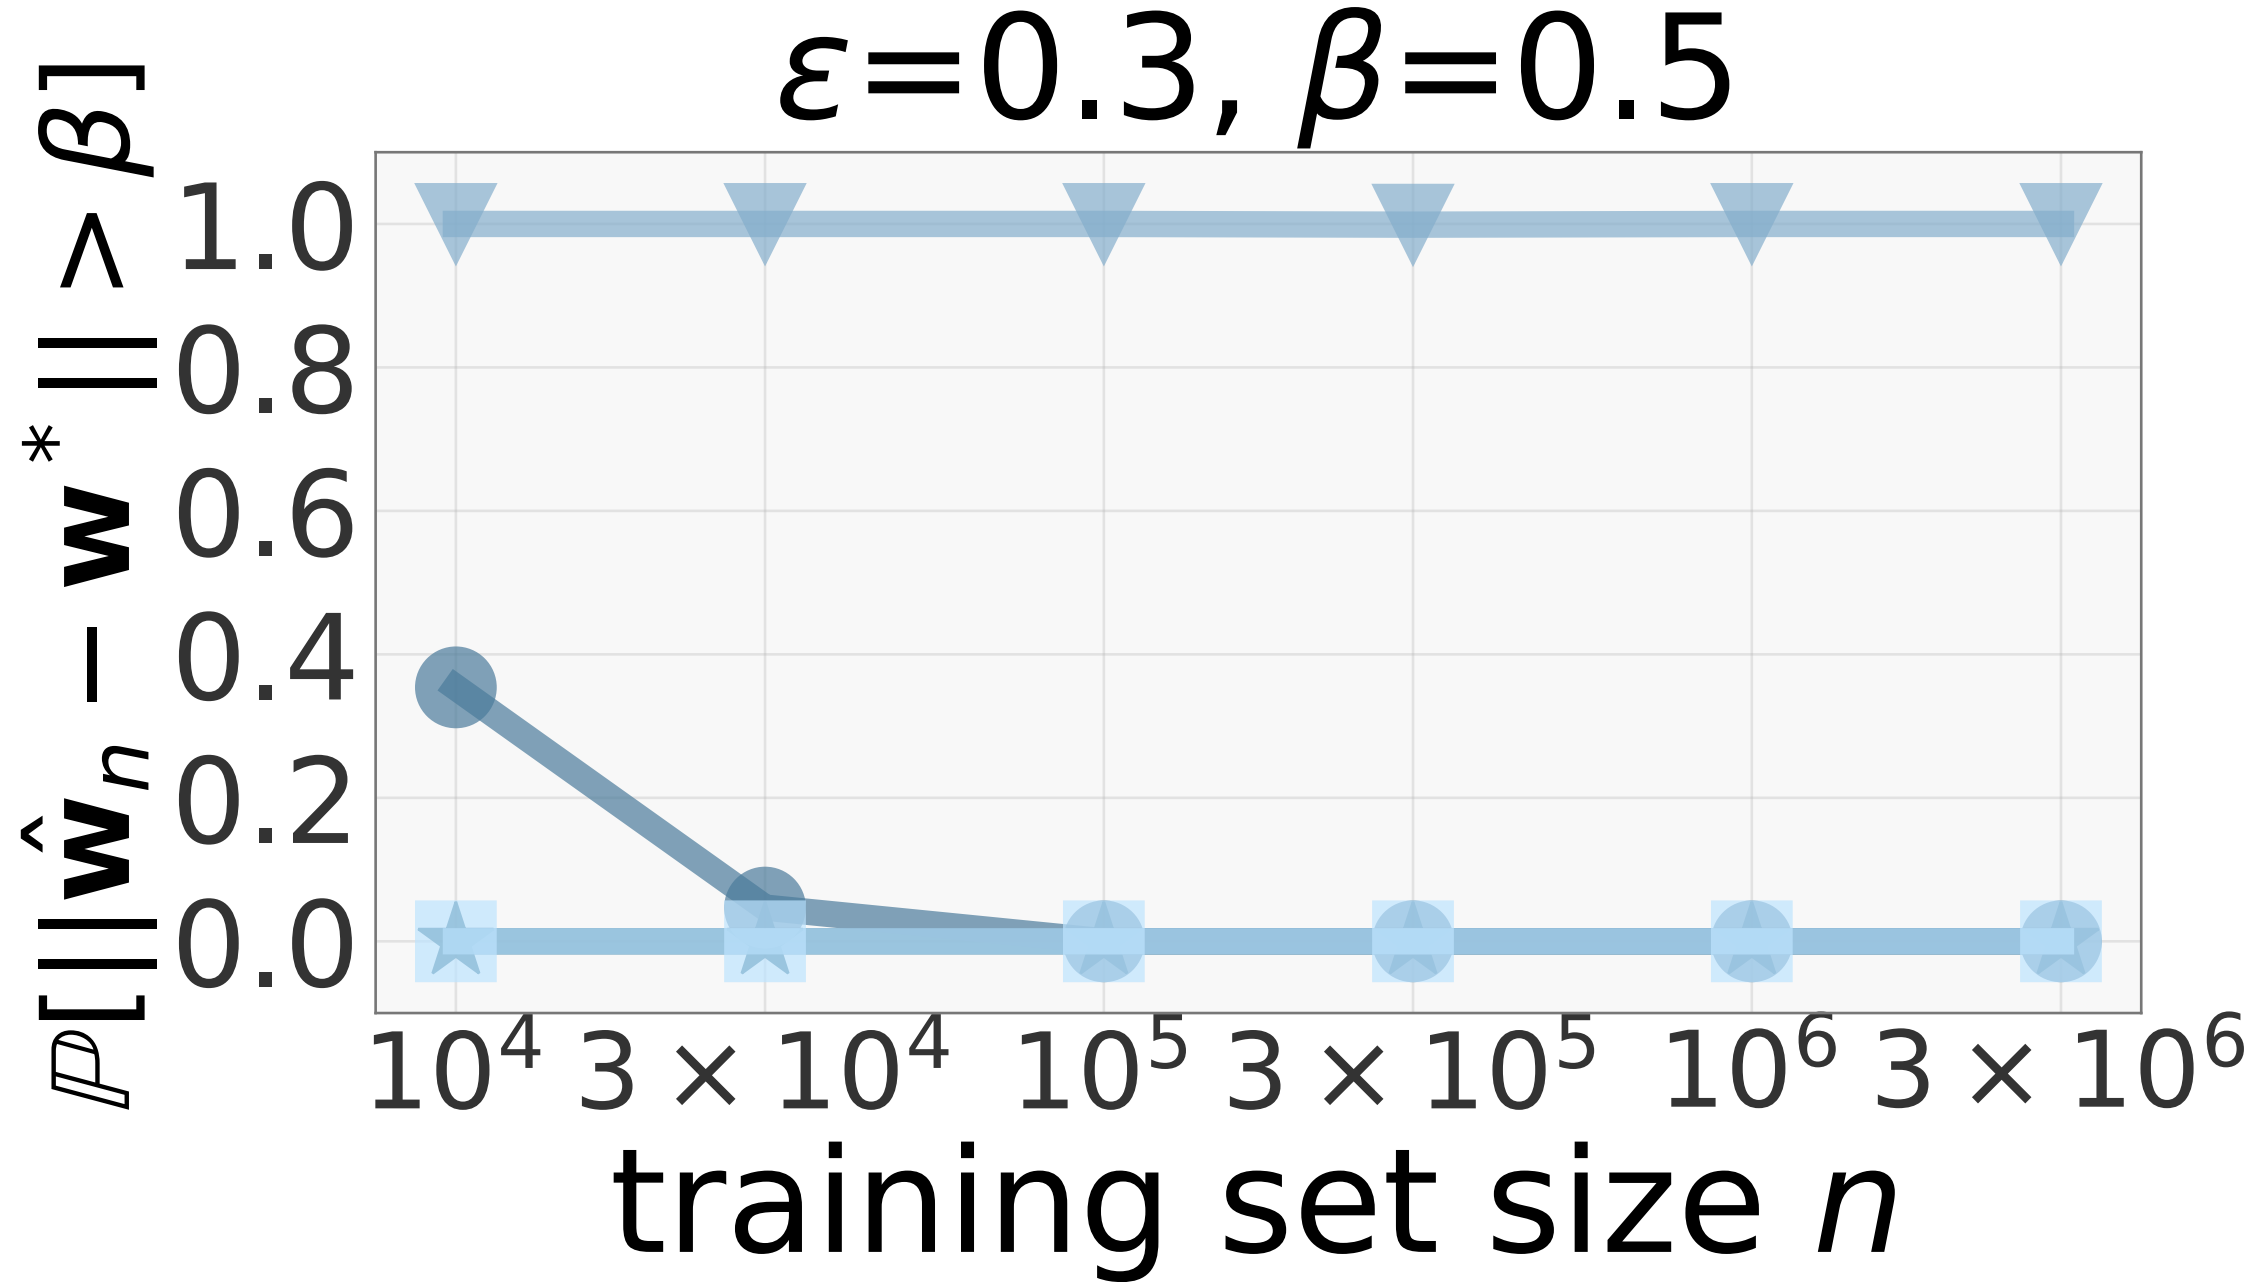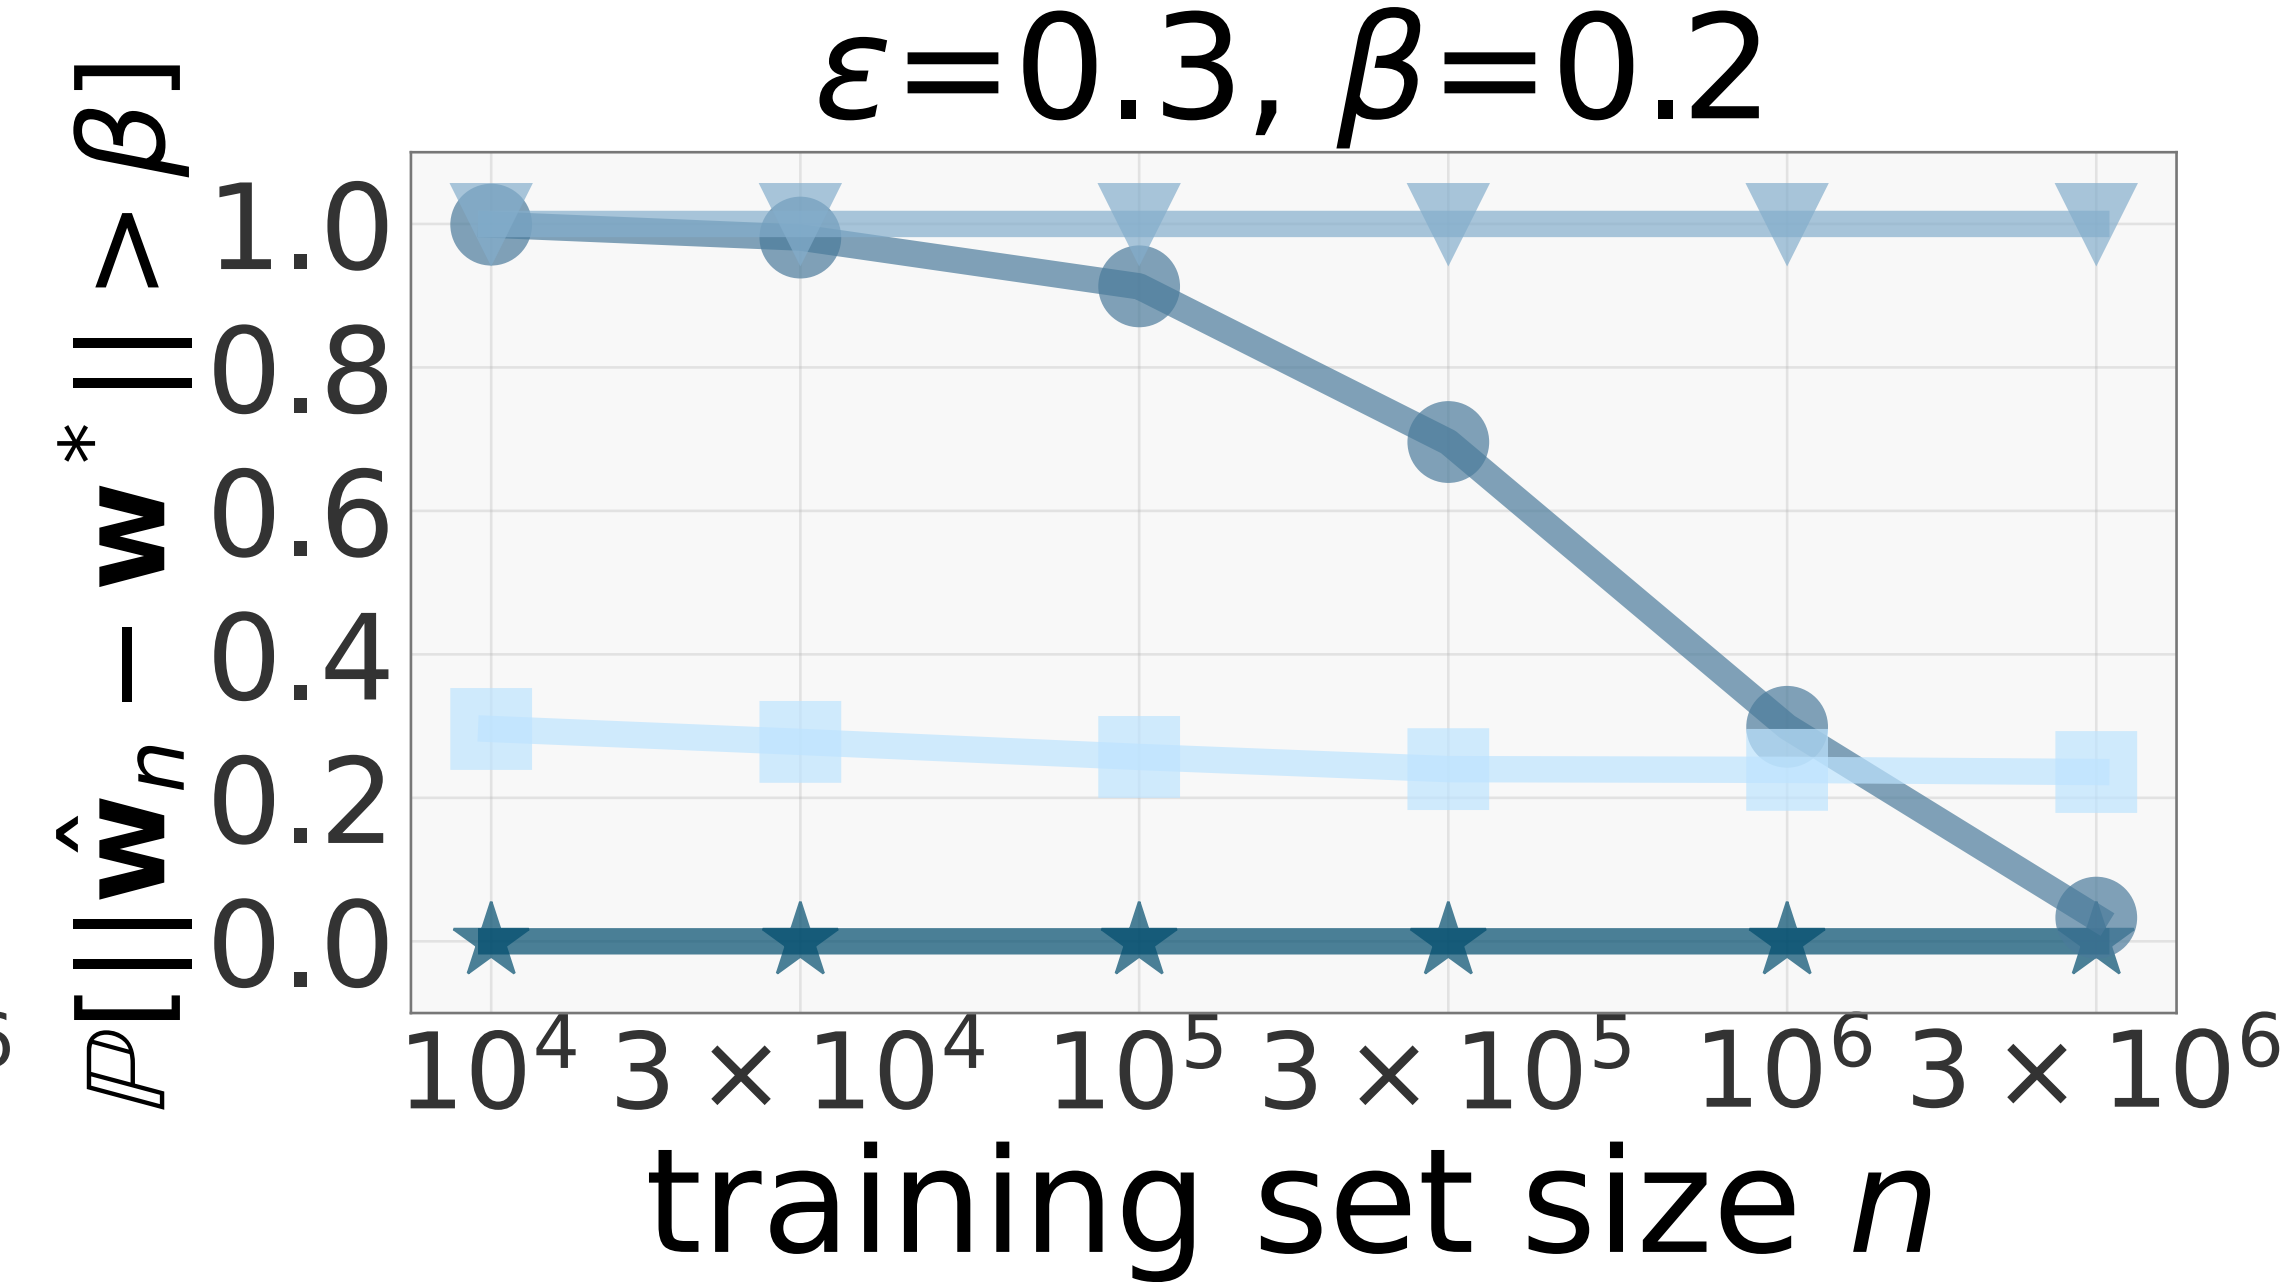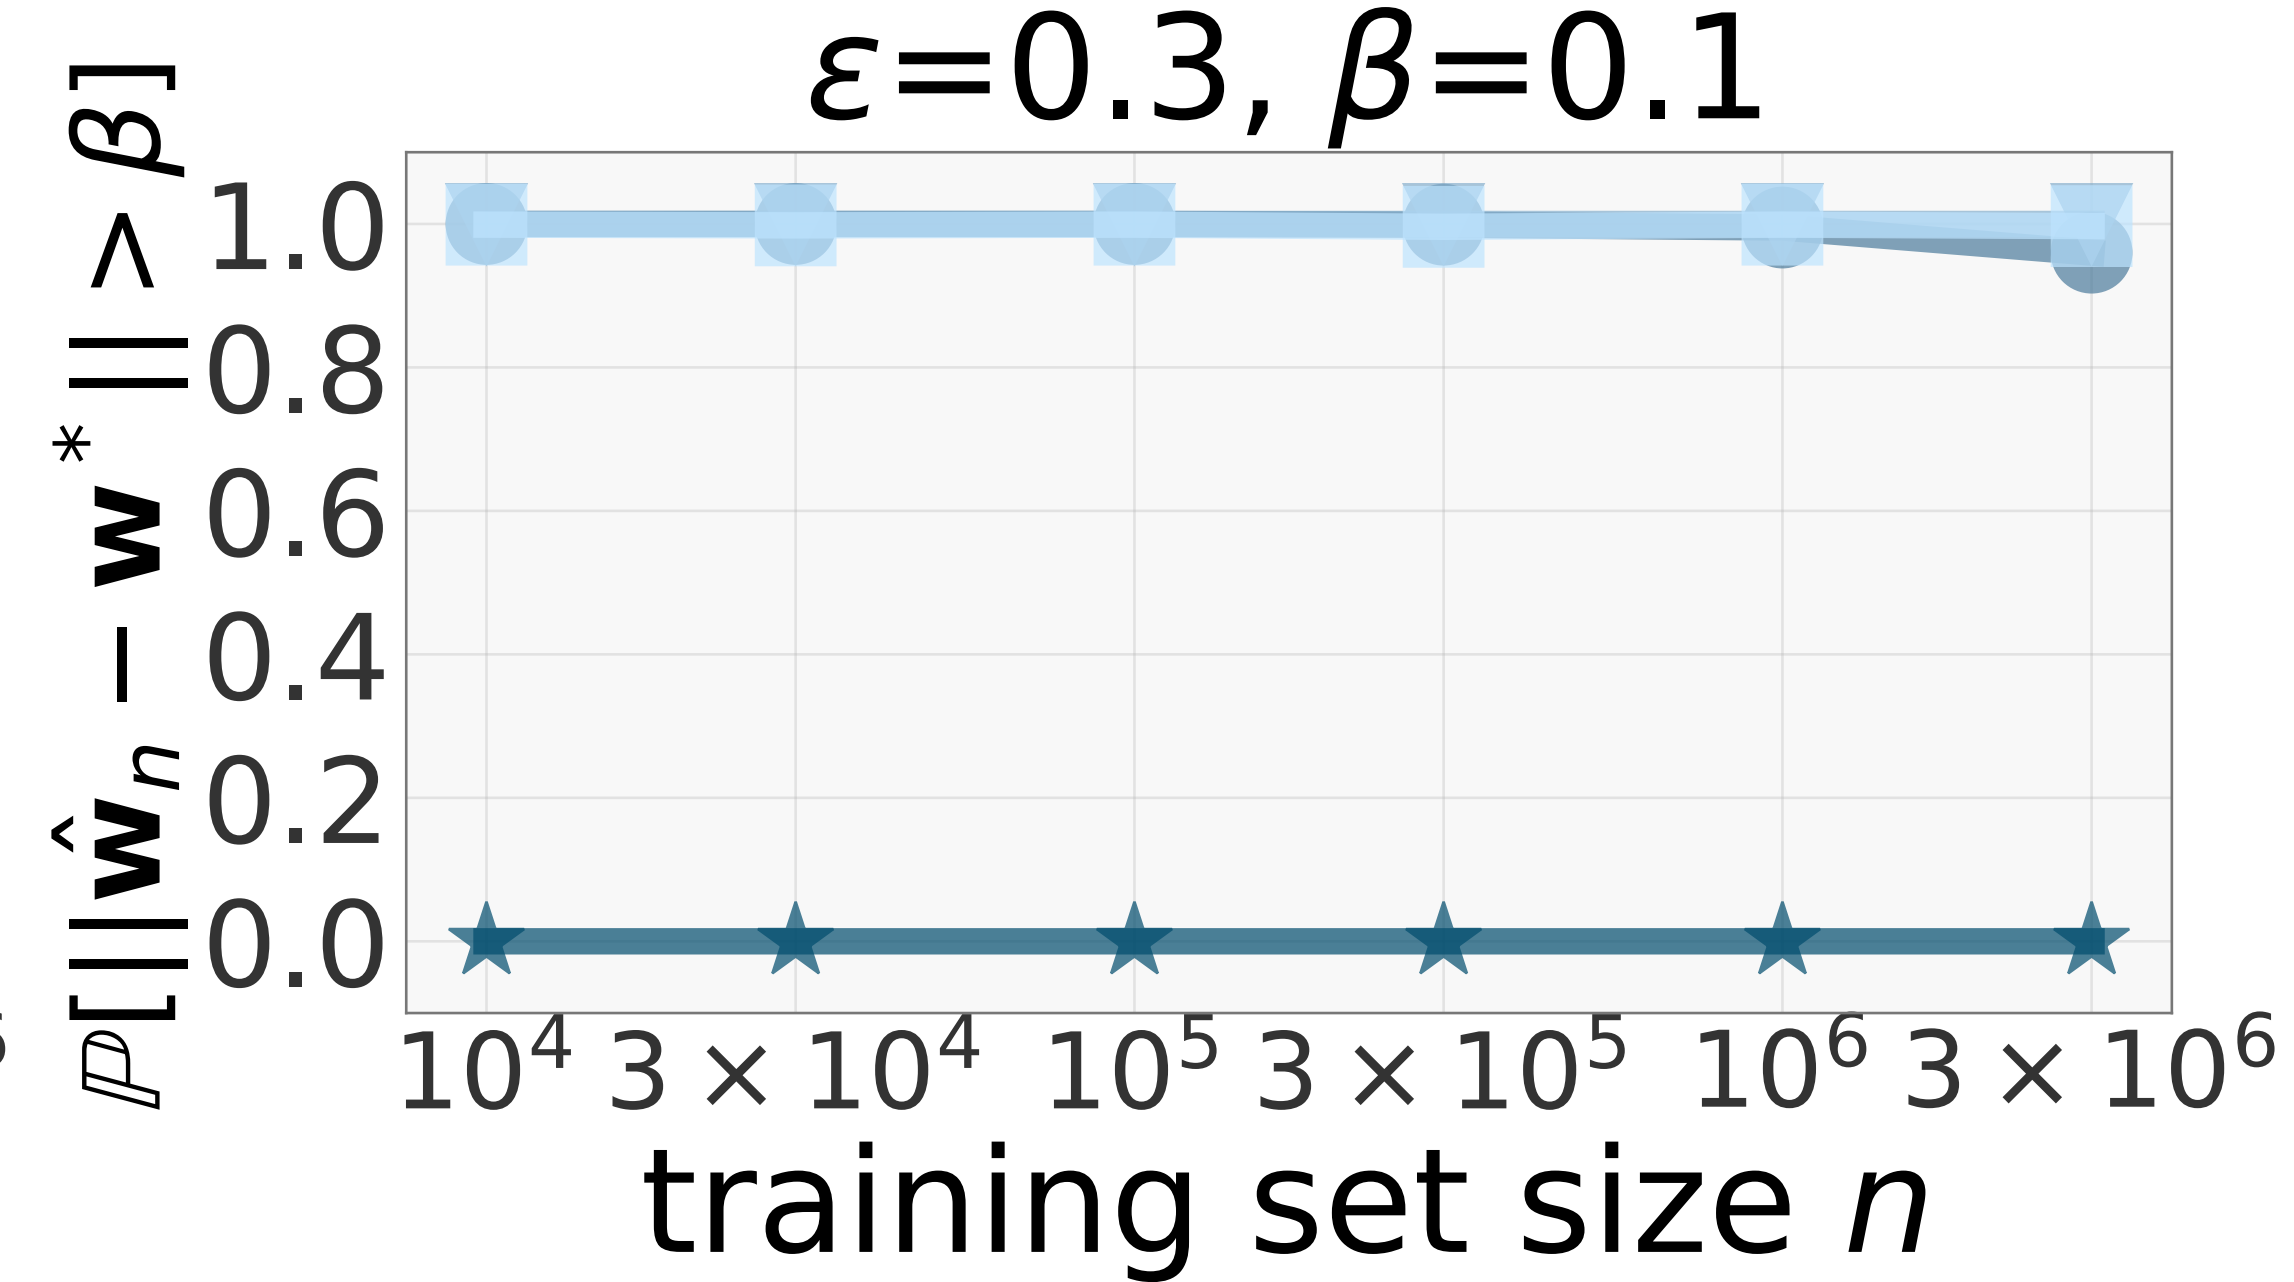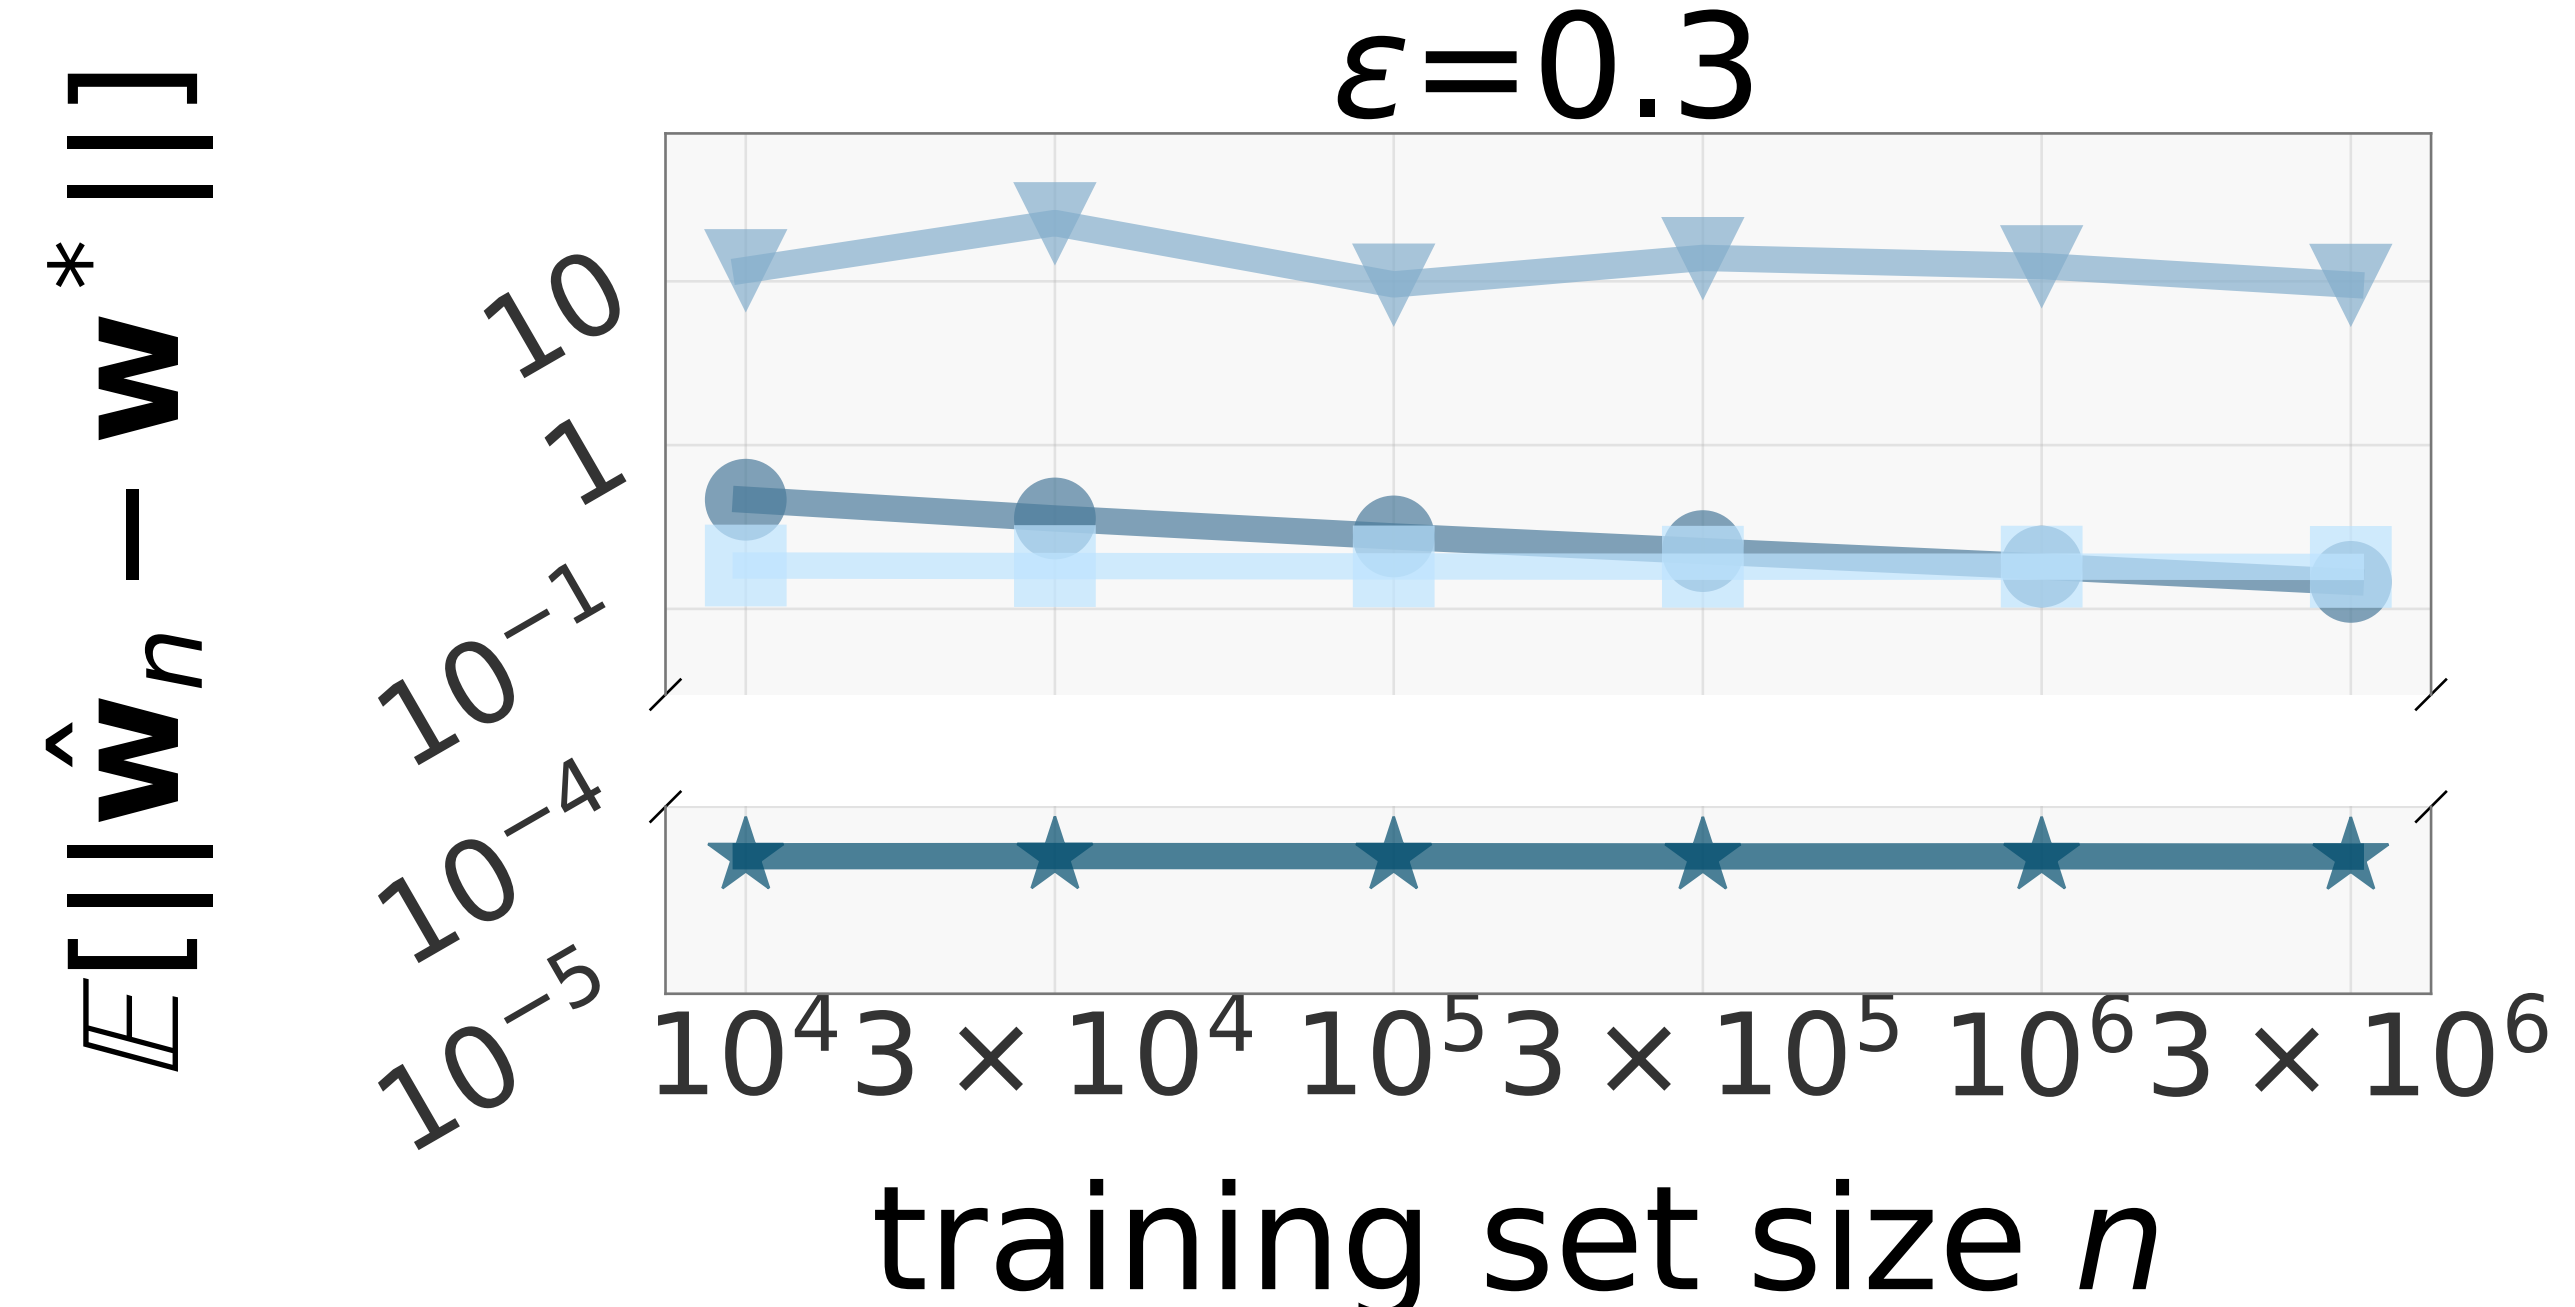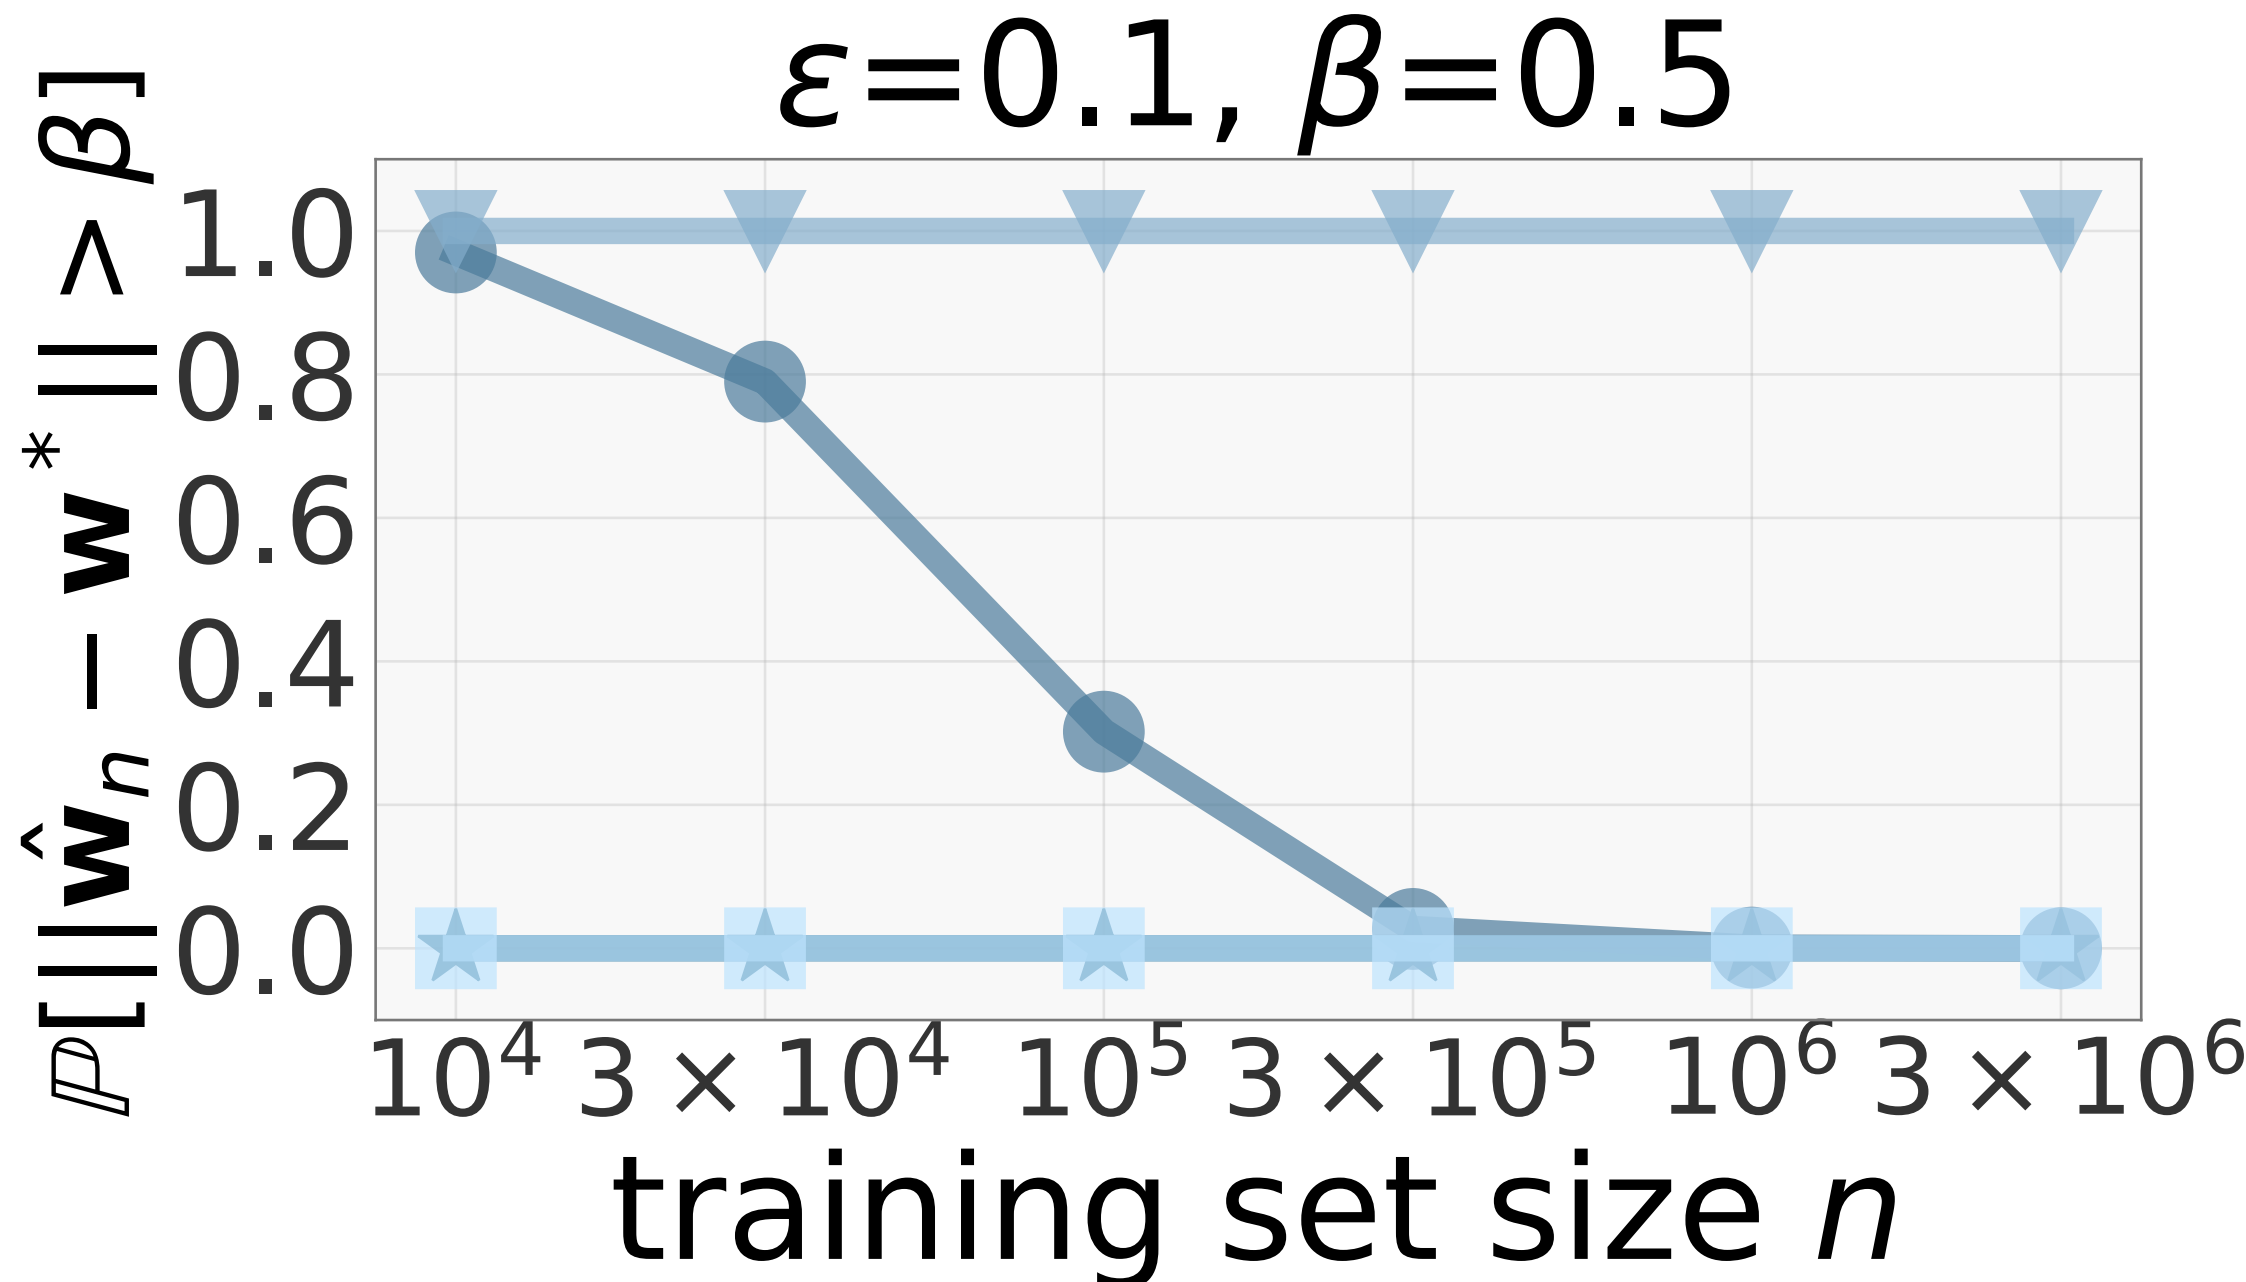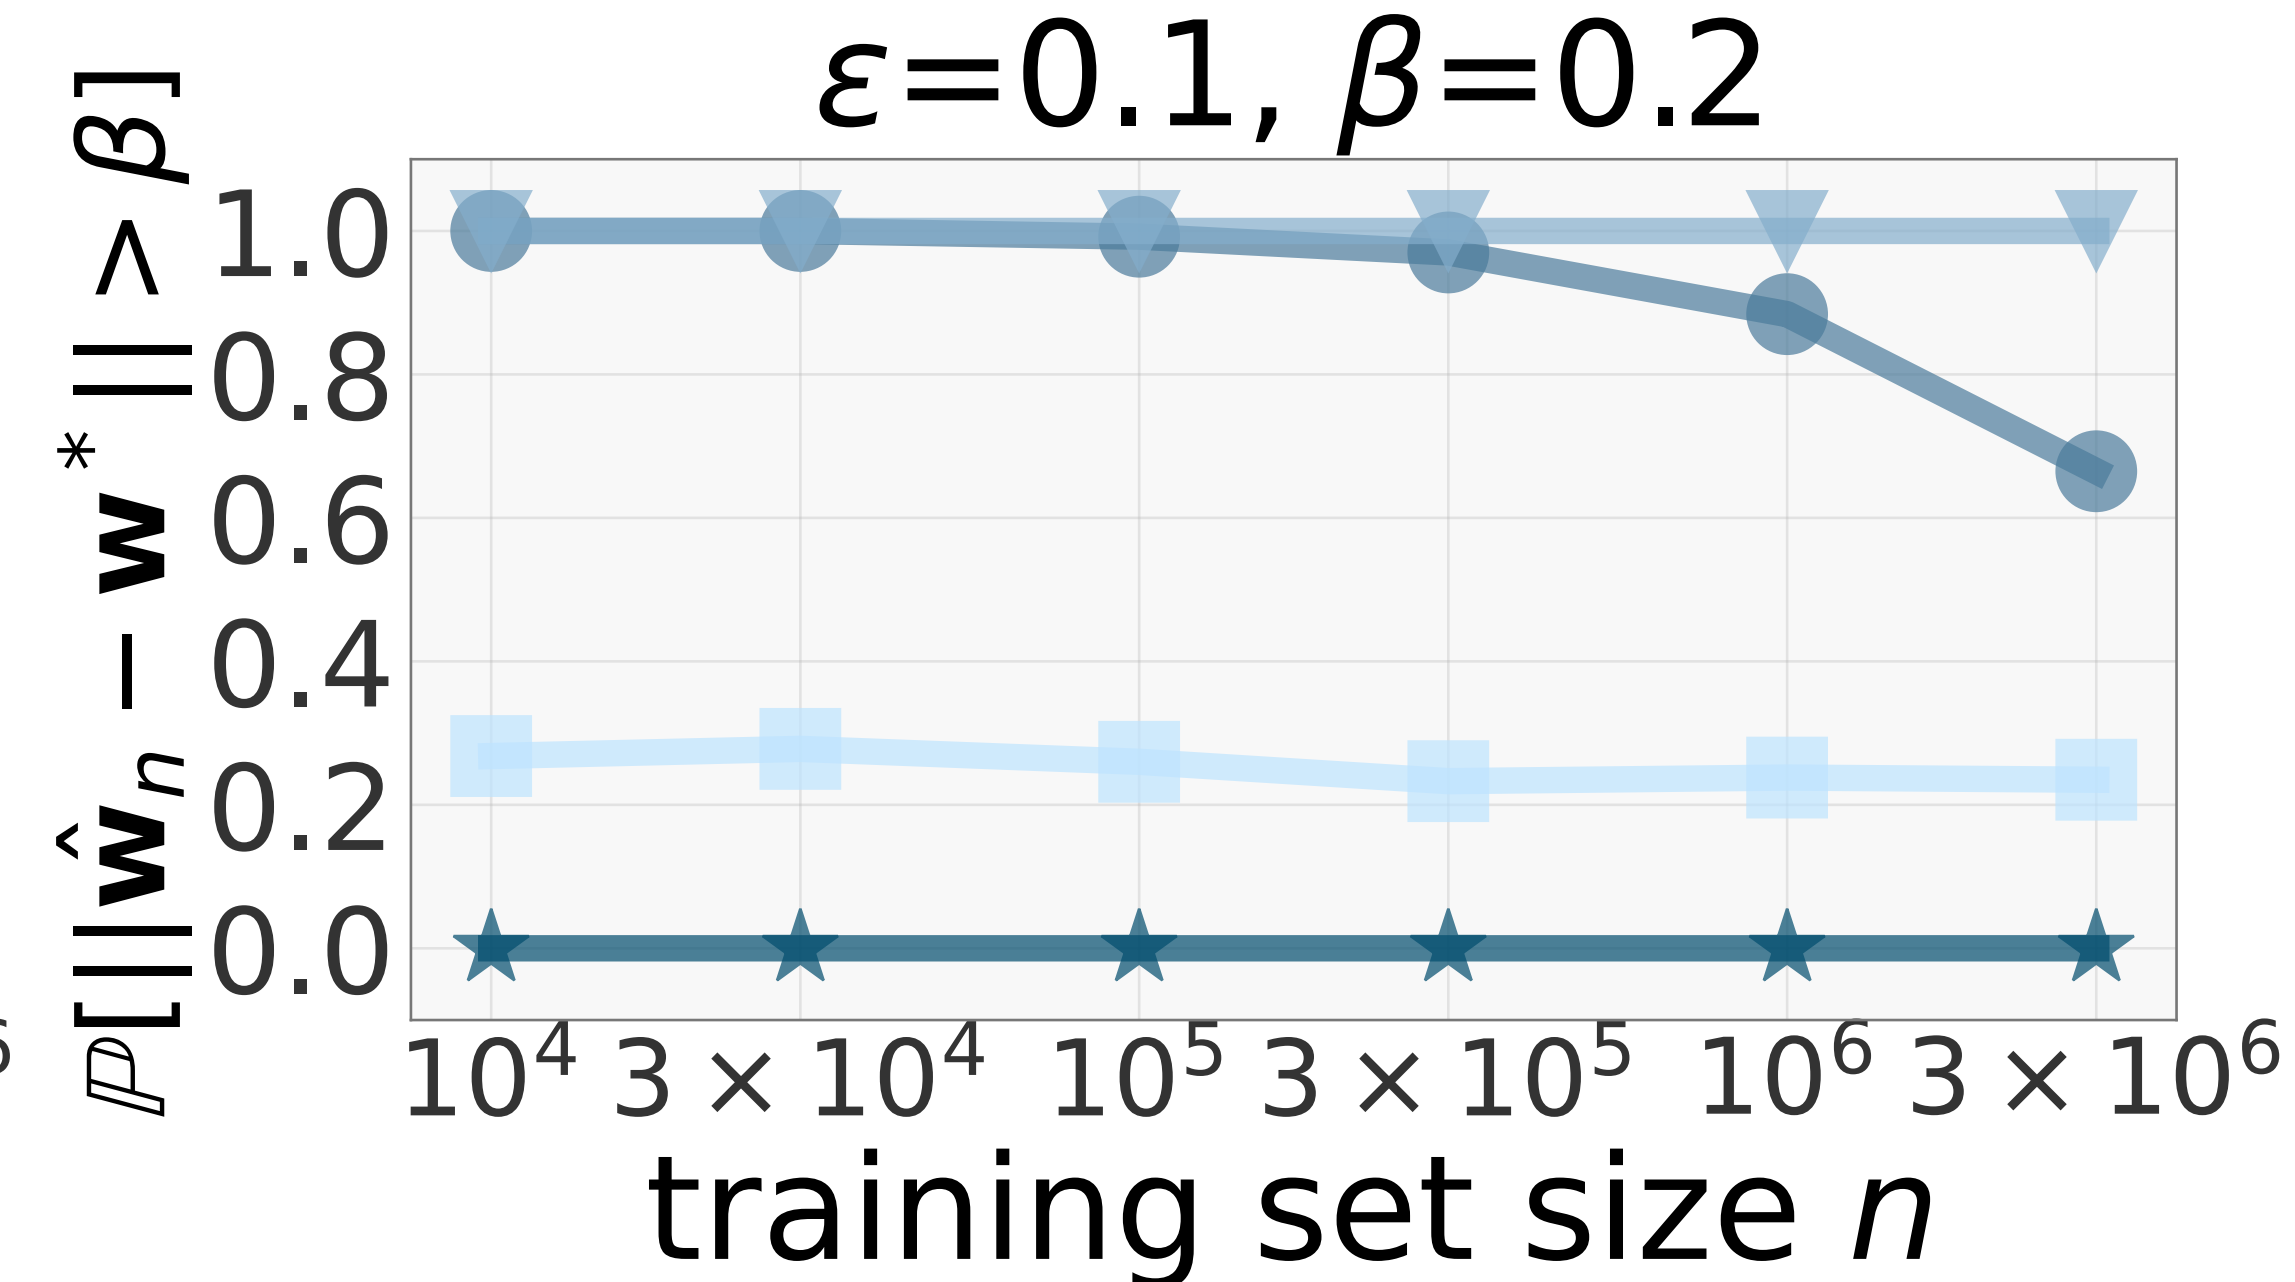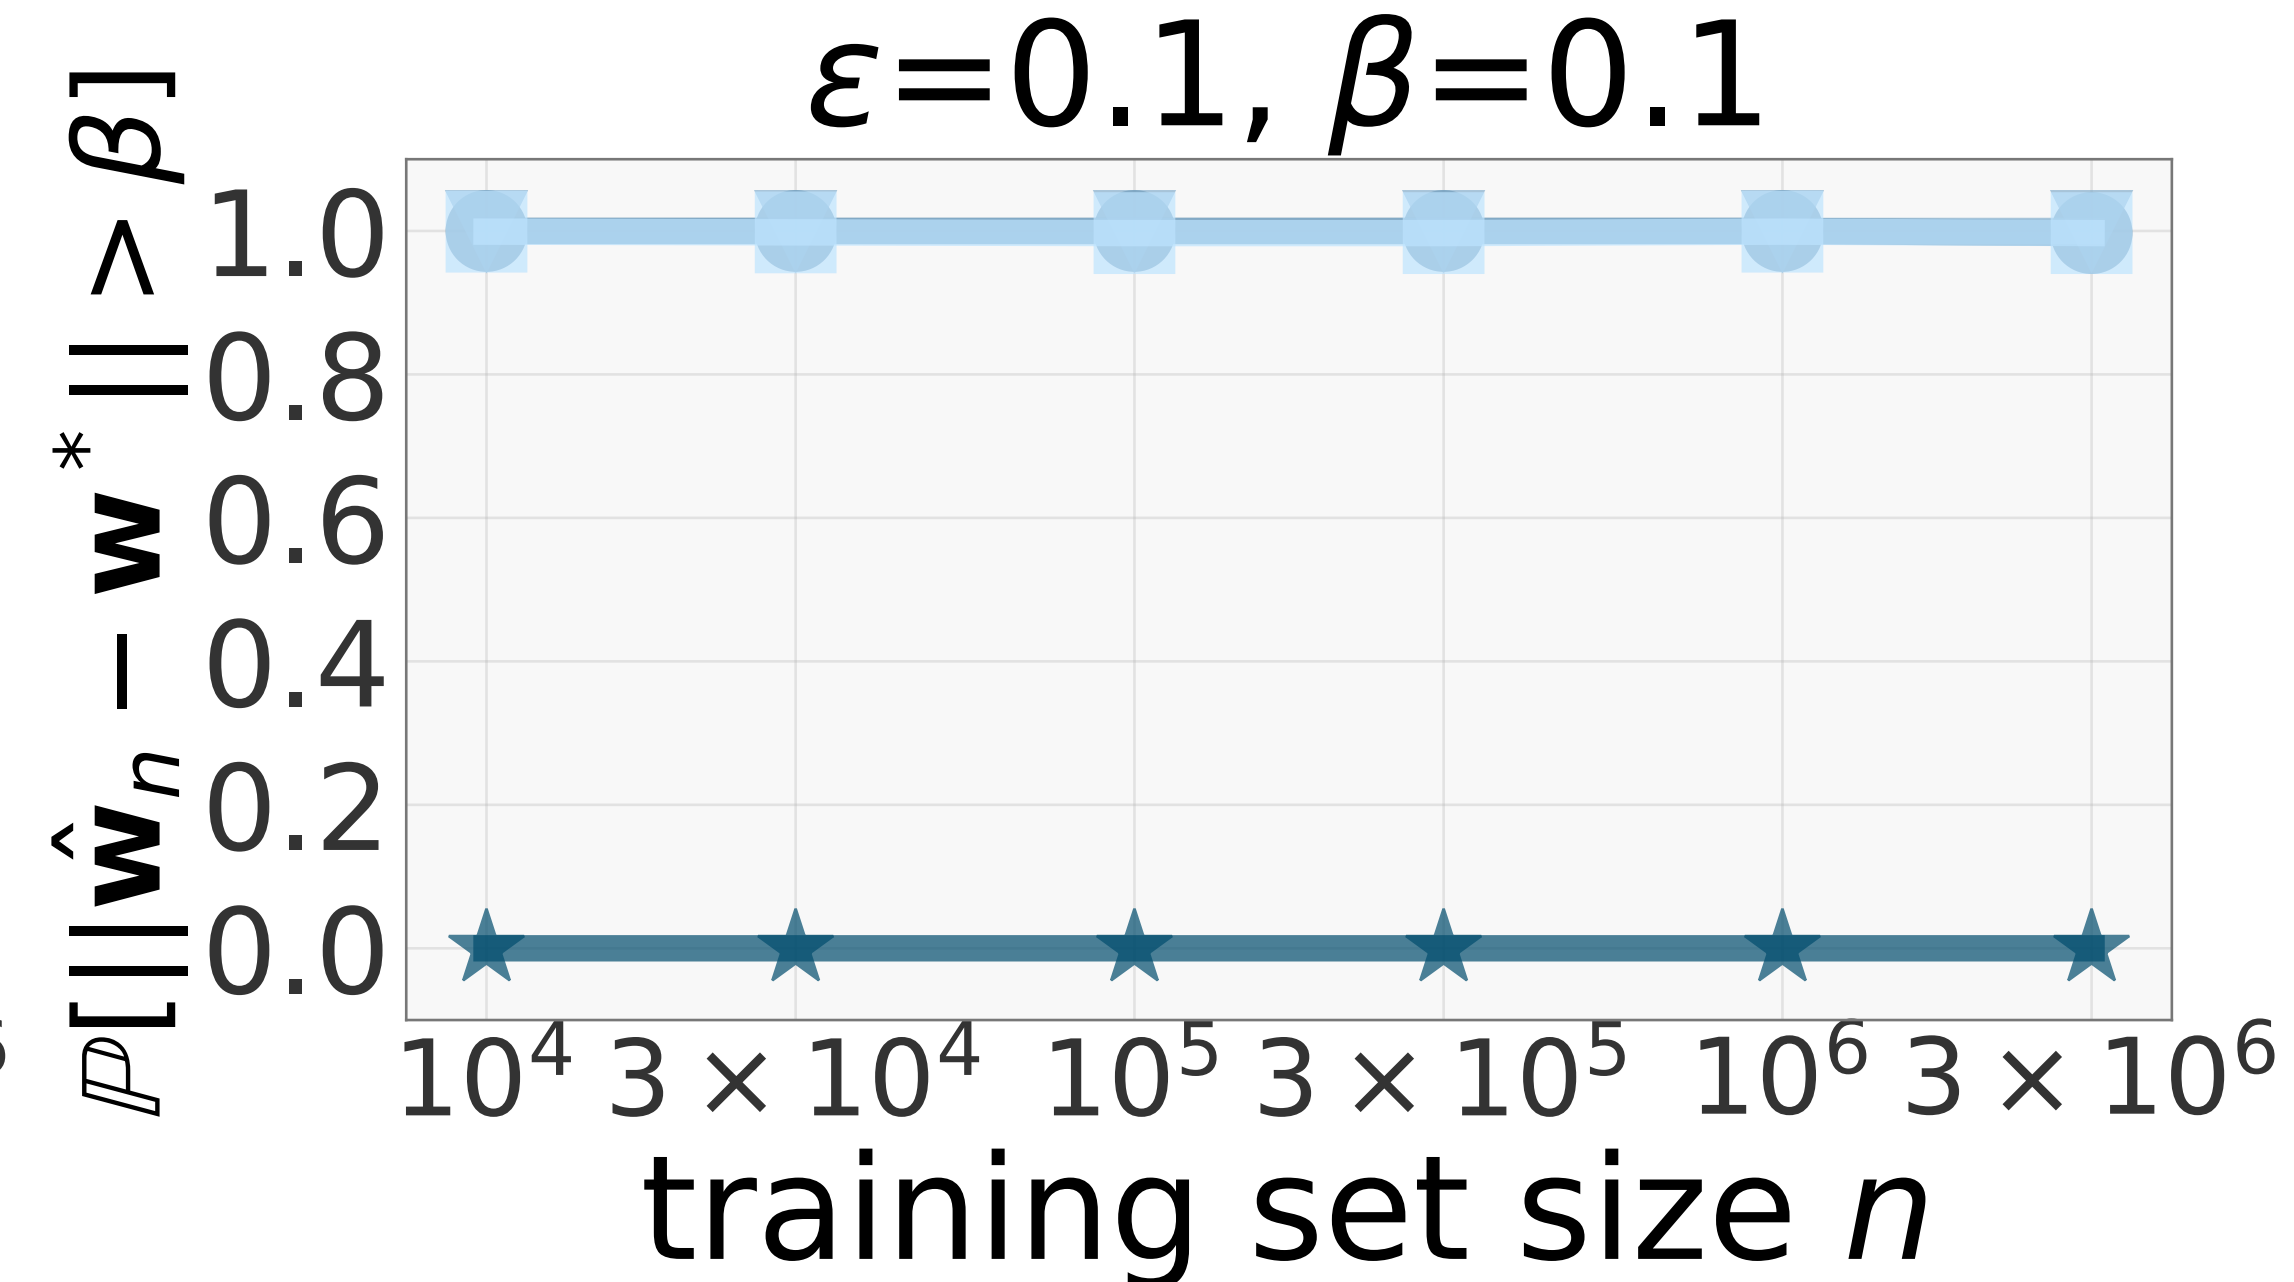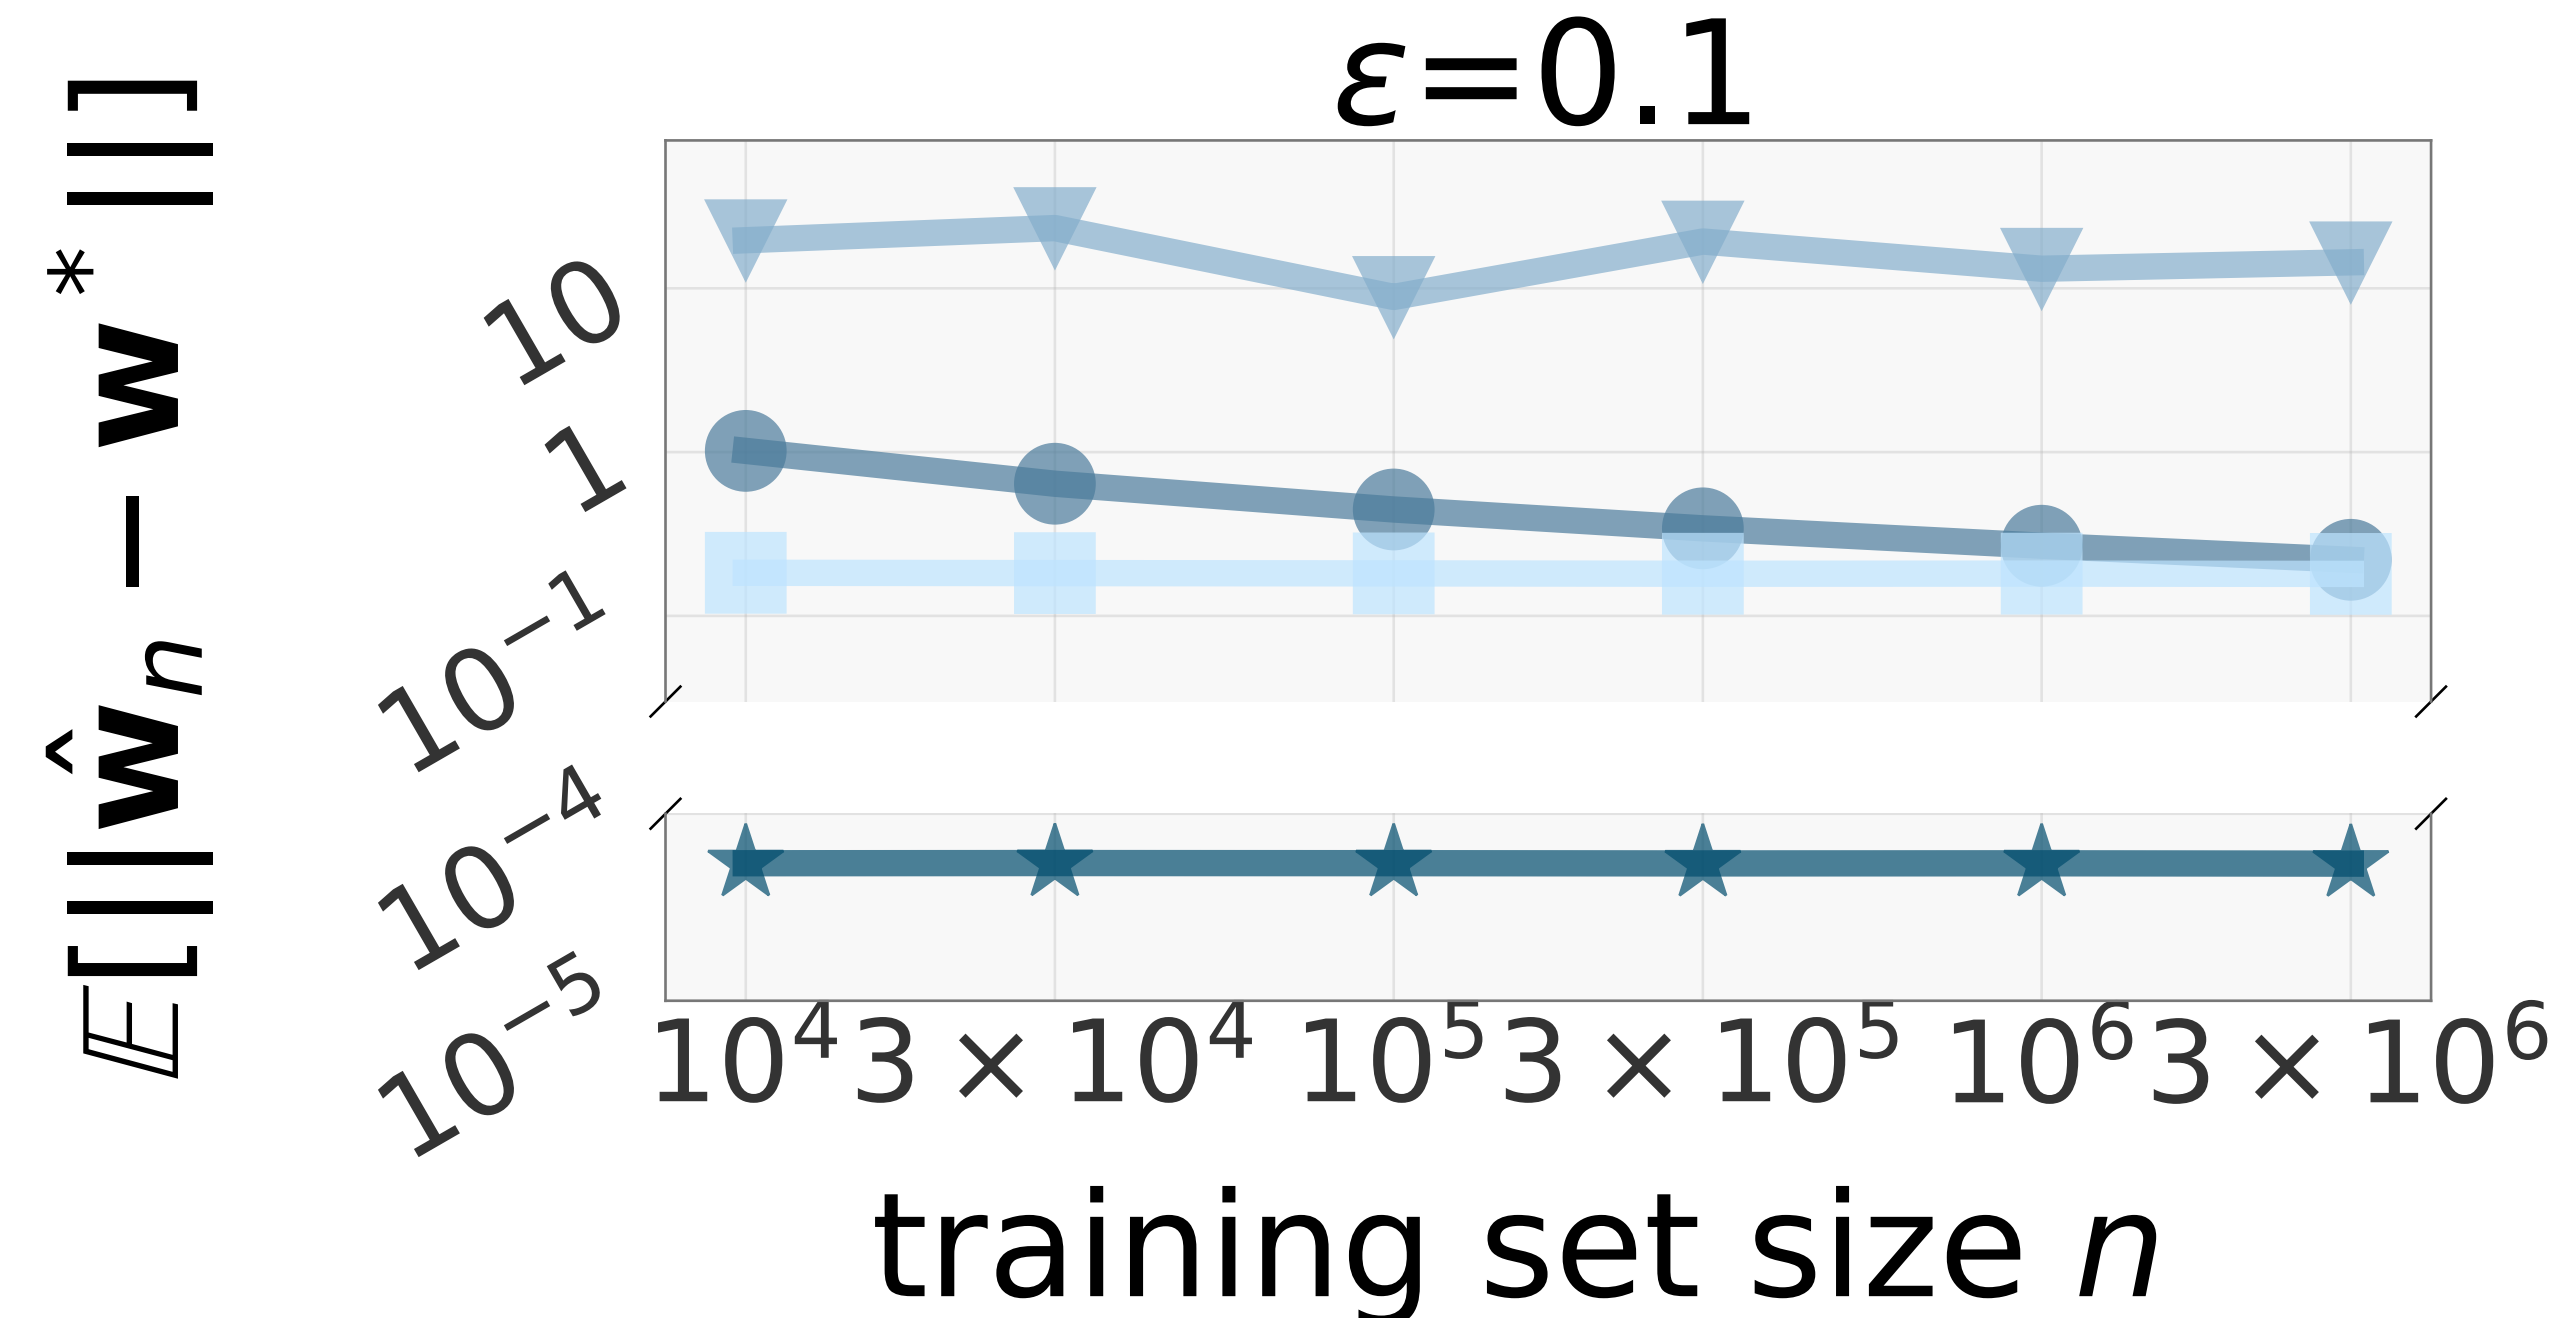

Supplement: supplementary_material [file attachment]

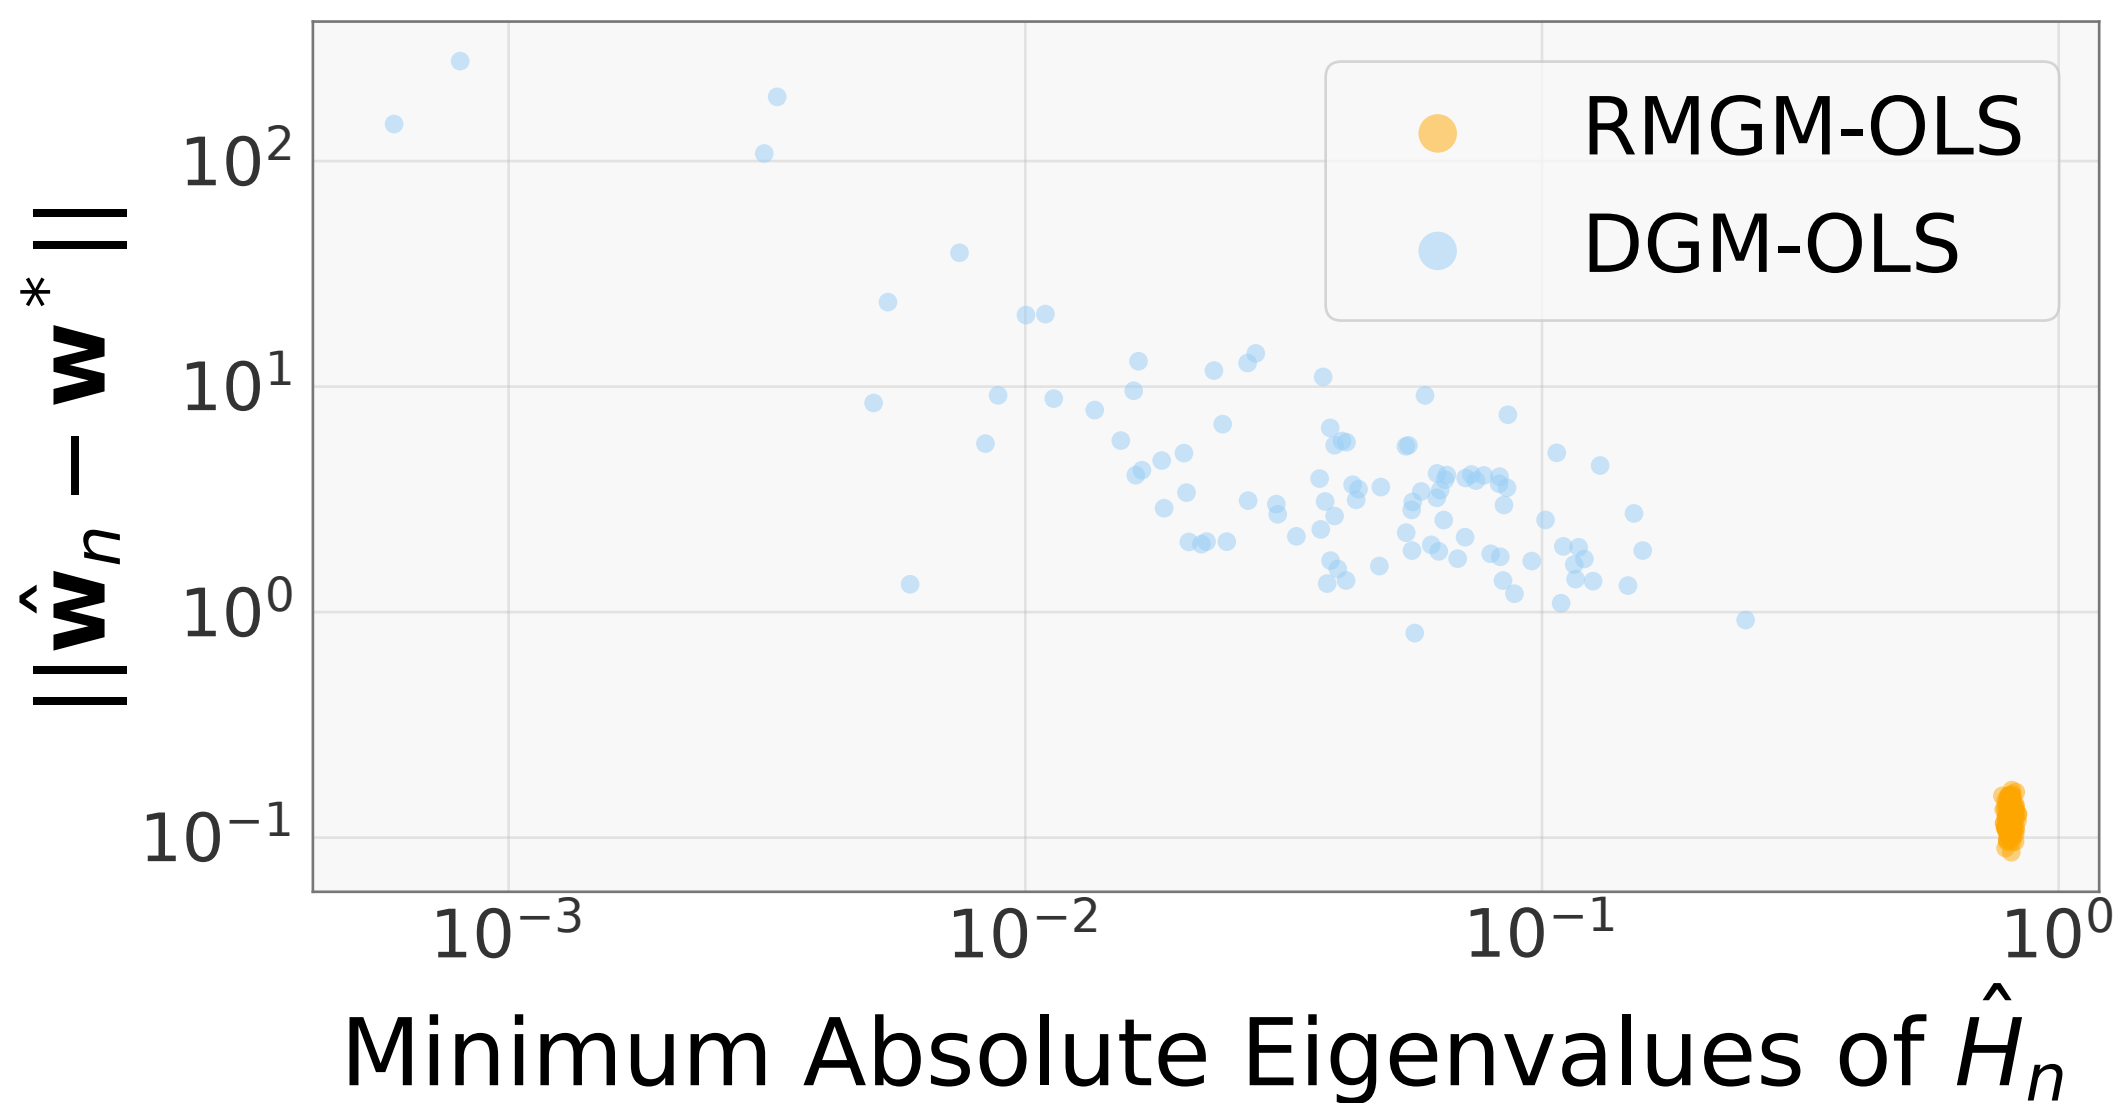

(a) Synthetic Dataset

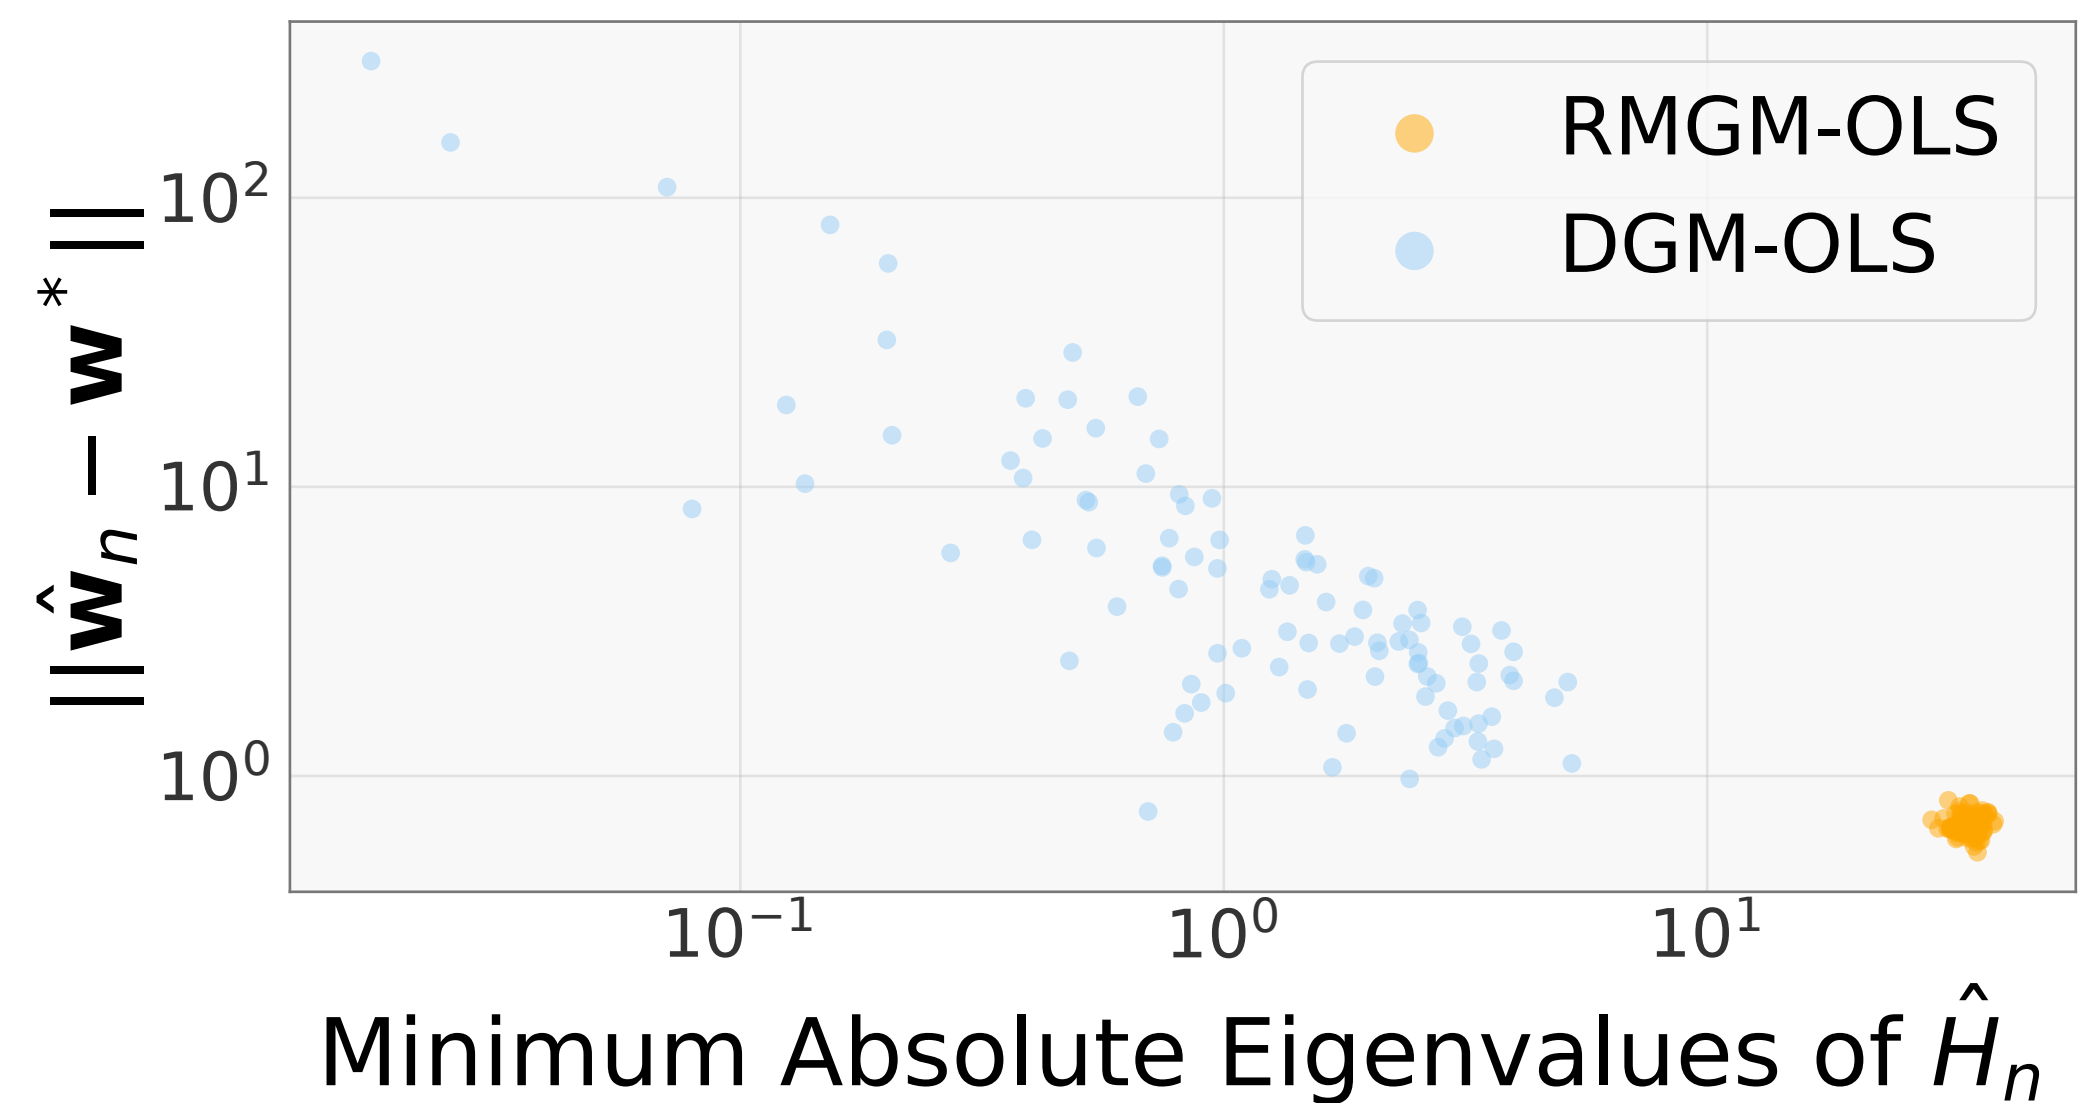

(b) Insurance Dataset

Supplement: supplementary_material [file attachment]
